# Supplementary material
Source: HighWire-hosted journal article supplement (https://jmg.bmj.com/content/57/9/617)
Supplement: inline-supplementary-material-2 [file inline-supplementary-material-2.xlsx]

## Sheet: lof_case_control_count
Gene	Case	Control
RNF14	1	0
RNF10	1	0
REM2	1	0
PMM1	2	0
ASS1	0	1
ZNF879	0	1
ZNF878	1	0
DISC1	1	0
ZNF701	1	0
CAMK4	1	0
RNF114	0	1
RNF112	0	1
RNF111	2	1
ZC3H18	1	0
GRIN1	1	0
DHX8	1	0
TCOF1	1	0
NUP98	1	0
XPC	1	0
SP1	1	0
NUP93	1	0
GOLIM4	1	0
OPA1	2	0
RAB40C	1	0
COL7A1	6	5
KLLN	0	1
OVCH2	0	1
OVCH1	1	1
ITGA9	1	1
ATP2A1	3	0
RARRES2	1	0
ITGA2	1	0
ITGA3	1	0
ITGA5	0	1
ITGA6	1	0
ITGA7	3	1
TRHR	1	0
DENND4C	1	1
UFSP1	1	1
UFSP2	1	0
GAP43	1	0
HRH4	0	1
TIPRL	1	0
CYP27B1	1	0
FBXL17	1	0
FBXL16	1	0
GHDC	2	0
SDK2	0	1
TPRN	1	0
COL4A6	0	1
COL4A4	1	0
COL4A3	1	0
COL4A2	0	1
COL4A1	1	0
OR8J3	1	0
GRN	1	0
CHST5	1	0
ITGAX	1	0
OR8J1	1	0
PREP	1	0
ITGAL	1	0
ITGAM	1	0
ITGAD	1	0
SPR	1	0
FAM134A	1	0
LRPAP1	3	0
MUS81	1	0
CYFIP1	1	0
IGF2R	2	1
TMPRSS11F	1	1
RAD21L1	1	0
SLC36A4	1	0
ERICH3	2	2
ERICH1	2	0
ART1	1	0
ART5	3	0
TCEA1	1	0
COX4I2	1	0
COX4I1	2	0
PIPOX	1	0
CADPS2	1	0
MCF2L	2	0
LEO1	1	0
ATP1A4	1	1
MGRN1	1	1
SPHK2	1	0
SPHK1	1	0
CBLB	1	1
CPEB4	1	0
CPEB3	0	1
SBSPON	1	0
RBMXL1	1	0
SRBD1	2	1
ZNF780A	0	2
RHEBL1	1	0
IFT80	1	0
TBC1D31	1	2
IFT88	0	1
POU5F1B	1	0
KISS1R	1	0
MCM10	1	0
ATG4C	3	1
ATG4D	0	1
LRGUK	1	0
CFB	1	0
ATP6V0E2	1	0
AAAS	1	0
SIDT1	2	0
CNPY4	2	0
NAALAD2	1	0
KNDC1	1	0
HMG20B	2	0
GLT8D2	2	0
C4orf17	1	1
CHFR	1	0
SYPL1	1	0
RFX8	1	0
RFX5	1	0
APP	1	0
NRXN2	0	1
RFX2	2	0
APC	0	1
UQCRC2	1	0
XPNPEP1	0	1
UQCRC1	1	1
TEN1-CDK3	1	0
PAPLN	4	0
RETSAT	1	0
LHCGR	1	0
INF2	1	0
TARS2	1	0
DPYSL3	1	0
FBF1	1	1
CYP1B1	2	0
CYP2R1	1	0
LOC101929705	1	0
GJA9	1	0
ARL2-SNX15	1	0
ZNF117	0	1
KDM3A	0	1
TMC4	1	0
TMC5	3	0
TMC6	1	0
TMC7	0	1
TMC1	1	0
TMC2	0	1
MLF1	0	1
QPRT	0	1
IFT140	2	0
FAM157A	0	1
MECOM	1	0
RSPH3	1	0
RSPH1	1	0
IFI16	0	1
C9orf129	0	1
CFHR2	1	0
PHACTR4	1	0
CLIC5	1	0
LRSAM1	0	1
LARP4B	0	1
ASGR2	1	0
BPNT1	1	0
SOWAHB	1	0
FAM32A	1	0
PCDHA8	2	0
FER1L6	1	0
FER1L5	1	1
ZMAT3	1	0
MYBL1	1	0
SMOC2	1	0
MYBL2	1	0
ITGB1BP1	0	1
ZNF2	1	0
TIPIN	1	1
C11orf16	1	1
ZAP70	1	0
RAC2	1	0
VCL	1	0
CPLX3	1	0
AP2A2	2	0
VCX	1	0
NIM1K	1	0
PBX2	1	1
AIRE	1	0
NSUN5	1	0
NSUN7	1	0
NSUN6	0	1
PRAMEF1	2	0
TARS	0	1
TARP	0	1
PAGR1	1	0
RAD9B	2	0
KMT5A	1	0
B3GAT3	1	0
CPPED1	1	0
CALM3	1	1
GSDMA	1	0
GSDMB	0	1
GSDMC	0	1
UPK1A	1	0
DLGAP2	1	0
A1BG	1	0
OIP5	1	0
CLCN2	1	0
CLCN1	1	0
CLCN7	1	0
CLCN5	1	0
BRD9	1	0
BRD4	1	0
BRD7	1	0
BRD3	1	0
PTPN18	1	0
DNAJA4	1	0
PTPN13	1	0
UTRN	3	0
MRPL24	1	0
DMD	3	1
GAB4	1	0
C2orf81	0	1
ZSCAN9	1	0
NDRG1	1	0
NDRG2	1	0
RNF130	1	0
RAPH1	1	0
VIL1	2	0
SUPT20H	0	1
TSHZ2	0	1
VILL	1	0
ZNF582	1	0
TIPARP	1	0
ZNF584	0	1
ZNF587	4	1
ASUN	1	0
MYO1H	1	0
MYO1G	0	1
MYO1F	1	1
MYO1C	0	2
MYO1A	0	1
CHMP3	1	0
CHMP7	1	0
CHMP6	0	1
BCR	1	1
PGBD4	1	0
OR52N2	1	0
CTPS1	1	0
LGALSL	2	0
SIAE	1	0
KRTAP19-3	1	0
FAM160B2	1	0
ATAT1	0	1
NEMF	1	0
SRF	1	0
TSSK3	0	1
ZNF322	0	1
LGALS9	1	0
LGALS8	0	1
LGALS3	0	1
CFAP36	1	1
TDG	1	0
EIF2AK4	1	1
NMB	0	1
EREG	1	0
MYO19	2	0
ASAP1	2	0
MYO10	2	0
PLAUR	0	1
ENTPD5	0	1
LOR	1	0
SLCO1B3	0	2
MPDU1	1	0
KIAA1033	2	0
LOX	0	1
LRRC29	1	0
TIMM17A	1	0
C14orf132	1	0
LPCAT1	2	0
PIGG	0	2
PIGL	1	0
PIGN	1	0
PIGQ	0	1
JCHAIN	1	0
CCDC178	2	1
ALPP	0	1
RHPN1	0	1
CCDC170	0	1
CCDC171	2	1
SRRM3	1	0
SRRM2	1	0
CCDC175	1	0
RGL1	0	1
EBP	1	0
MYO5C	1	0
ALPI	1	0
TM2D1	1	0
PECR	0	1
DDHD2	0	1
ZFAND6	0	1
CEP128	1	0
SLC39A10	1	0
SLC39A11	1	0
INMT-FAM188B	0	1
MIR1-1HG	0	1
NTRK1	2	1
CEP126	0	1
ARHGAP22	1	0
ARHGAP27	0	1
EVI5	0	1
ARHGAP29	1	0
ARHGAP28	0	1
DDIT3	1	0
COL19A1	2	0
ATG2A	2	0
MLYCD	1	0
BMP1	0	1
OR5R1	0	1
2019-03-10	1	0
PTOV1	1	0
RASSF2	0	1
RASSF7	2	0
RASSF6	2	0
VMO1	1	0
MCOLN2	1	0
CHD1	0	1
CHD7	1	0
CHD9	1	0
CHD8	2	1
SKIV2L	6	0
TTC4	1	0
RAB3GAP2	0	1
IL4R	0	1
DYNC1LI2	0	1
EFHC1	2	0
CAPG	1	0
ETHE1	1	0
ABCG1	2	0
PLSCR4	0	1
PRDM15	2	0
PLSCR2	0	1
PLSCR3	1	0
PRDM11	1	0
ABCG8	1	0
MPO	2	0
MPI	1	0
MCPH1	2	0
QRSL1	2	0
AKR1B10	0	1
FCER1A	0	1
C4orf33	1	0
GGA3	1	0
C15orf48	0	1
TSNAXIP1	1	1
C10orf95	1	0
FHOD1	1	1
FHOD3	0	1
ADH5	1	0
ADH4	1	0
PKD2	1	1
PKD1	2	1
ZNF138	1	0
PRKACB	1	0
STAMBPL1	1	0
ZNF131	1	0
ZNF133	0	1
ZNF134	0	1
ZNF135	1	1
LMBR1L	1	1
HDHD3	0	1
TALDO1	2	0
R3HDM4	1	0
CORO7	0	2
KCNK6	1	0
MLH3	1	0
KCNK2	1	0
TRIML2	1	0
C9orf142	1	0
VPS13D	1	1
ACOT13	1	0
VPS13A	3	2
SH3KBP1	0	1
VPS13C	1	1
VPS13B	7	0
CRYM	1	0
TMEM168	1	0
FOXN3	0	1
COL14A1	1	2
GRIN2C	1	0
PRLHR	1	0
IFFO1	0	1
TAP2	0	3
IL6ST	1	0
SNAP91	2	0
SBF2	0	1
ADD2	1	0
OGDH	1	0
SEMG2	1	0
SRFBP1	1	0
AAED1	0	1
MACROD2	1	0
AKAP5	1	0
DBNL	1	0
AKAP9	0	1
PSTK	1	0
TUBE1	1	0
CCDC113	2	0
PMFBP1	1	0
OVGP1	1	1
CCL23	0	1
ALPK1	1	0
ALPK3	2	0
ALPK2	1	0
C8orf48	1	0
UCK1	0	1
TP53I3	1	0
CUX1	0	1
BRF2	0	1
BRF1	1	0
FSIP1	2	1
GLYATL2	1	0
DNAJC6	1	0
CAMSAP1	1	0
DZANK1	0	1
DNAJC3	0	1
RRP12	2	0
SLC18A2	0	1
SLC18A1	1	0
GOSR1	0	1
RALBP1	1	0
ASAP3	1	1
FAM91A1	2	2
NUGGC	2	0
IVD	2	0
TRPV5	1	0
CPEB2	1	0
IL2RA	0	1
SLC17A8	2	0
ZFYVE26	1	0
SLC17A4	0	1
SLC17A1	1	0
SPAG17	1	0
MDH1B	1	0
C16orf58	1	0
CDK5RAP2	1	0
CMTR1	1	1
CDK5RAP1	1	0
FMO3	1	0
CCDC144A	2	0
SLC37A1	1	0
PMPCB	0	1
SLC37A4	1	1
CDK13	1	0
SULF2	3	0
CDK14	1	0
CDK15	1	0
NEO1	1	0
AASDH	1	0
BFSP2	1	0
ZNF302	1	0
ZNF300	2	0
MMP28	0	1
P2RY4	0	1
KIAA1549	1	0
LRRC43	1	1
LRRC42	1	0
LRRC45	1	0
LRRC49	1	0
B3GNT4	1	0
FNDC8	1	0
TSFM	1	0
FNDC5	1	0
FNDC7	2	0
B3GNT8	1	0
FNDC1	1	1
GPATCH3	1	0
PWWP2B	1	0
DAAM2	1	0
CCDC152	0	1
CCDC153	1	1
CCDC150	3	0
YIF1B	1	0
SGK494	0	1
CCDC155	2	0
CCDC158	1	0
WRAP73	1	0
H1FNT	1	0
TMCO5A	2	1
SYT8	1	0
SYT9	0	1
MTCH2	1	0
FN1	2	0
SYT1	2	0
OR6T1	1	0
SYT5	2	1
TIAL1	1	0
MEP1B	1	0
PCED1A	1	0
COLQ	1	0
CEP104	1	1
FAM189A2	1	0
MARCO	1	0
NBL1	1	1
TCP11L2	0	1
CNTROB	2	1
DRC7	0	2
ANGPT4	0	1
DUPD1	2	0
OR5T1	1	0
OR5T3	0	1
C1orf50	1	1
C1orf56	1	0
FCF1	1	0
ATP6V0A1	0	1
ATP6V0A2	2	0
GUCA1B	1	0
KRT75	1	1
KRT77	1	0
KRT73	0	2
ATM	3	1
KRT79	2	1
KRT78	1	0
SMPD4	1	1
ADAM32	0	1
ADAM33	1	0
SMPD2	1	0
BRIP1	0	1
ITGBL1	1	0
HFE2	1	0
TTC28	0	1
TTC29	1	0
DOT1L	1	1
PATL2	1	0
CARS	0	1
NPY2R	1	0
ENO3	1	0
TAOK3	1	0
LLGL2	1	0
SLC22A16	1	0
SLC22A17	1	0
SLC22A15	1	0
SLC22A12	1	0
SLC22A13	1	0
SLC22A10	1	0
OBSCN	7	3
PTK7	1	0
PTK6	1	1
SERGEF	2	1
MCL1	1	0
SORBS1	1	1
SORBS3	1	0
SORBS2	2	0
SCARA3	0	1
RAB1B	1	0
ATG16L2	0	1
C3orf33	0	1
C4orf51	1	1
ARHGDIA	1	0
USH1C	0	1
C3orf38	1	0
IL17REL	1	0
SPECC1L-ADORA2A	0	1
MATN3	1	0
MATN2	1	0
TANC1	1	0
CES1	1	1
CES2	2	0
EBF3	1	0
KBTBD12	0	1
EBF1	1	0
LMNA	3	0
HBA2	1	0
ENDOU	1	0
DDX20	1	0
DDX27	2	0
ZNF154	1	0
ZNF155	1	1
ZNF91	1	0
ZNF98	1	0
ZNF99	3	0
FBXO18	1	0
FKBP15	2	0
RAET1E	0	1
FKBP10	1	0
FKBP11	0	1
FAM3B	1	0
FBXO16	3	0
FBXO17	1	0
FBXO15	1	0
CNGB1	4	0
C9orf163	1	0
SLCO4C1	1	2
PLA2G7	1	1
PLA2G3	3	0
ERBB2	1	0
KRTAP1-1	1	0
ERBB4	1	0
FPR1	1	1
OR2G6	2	0
CCDC78	4	0
CGRRF1	1	0
NACAD	1	0
TMEM104	0	1
SMPDL3B	0	1
SMPDL3A	1	0
TRANK1	2	0
CSHL1	1	0
ZCWPW2	1	0
ZCWPW1	1	0
SPEG	1	0
PDE4DIP	4	0
NT5C	1	0
MAP10	1	0
NKAIN3	0	1
MAP1A	0	1
PDCL3	3	1
FRMD8	1	0
IMMP1L	1	0
SPICE1	1	0
FRMD1	1	0
PKNOX2	1	0
PTCD3	1	1
DSCR3	1	0
PTCD1	0	2
HLTF	1	1
AGFG1	1	0
KRT5	1	0
KRT8	0	1
RRNAD1	1	0
VPS41	0	1
BCAP29	0	1
TMCC2	1	0
ECT2L	1	0
NMNAT2	0	1
ALOX12B	0	1
EPB41L1	1	0
EPB41L3	1	0
EPB41L2	1	0
EPB41L5	2	0
ACSS3	1	0
PLEKHM1	0	1
PLEKHM3	1	0
SLC43A2	0	1
SLC43A1	1	2
CNTNAP1	2	0
DFNA5	1	0
RRP36	1	0
AGXT	1	0
OR1F1	0	1
PPP1R15A	1	1
GPAA1	1	0
TREML4	1	0
RECK	1	0
CH17-360D5.1	1	0
SPDYE6	1	0
ROGDI	1	1
RUNX1T1	1	0
ZNF813	1	0
SPTBN5	5	1
SPTBN4	1	0
SPTBN2	1	0
ZNF814	0	1
ARPC4-TTLL3	0	1
TFAP2E	0	1
TFAP2D	1	0
KRTDAP	1	0
GBE1	0	1
OR51T1	1	0
PCNA	1	0
SLC44A4	1	1
MSI2	1	0
PCNT	2	2
PCNX	1	1
MRPL39	1	0
ENGASE	4	0
DNPH1	0	1
ANKFN1	2	1
REC8	1	1
NDUFS3	0	1
NDUFS5	1	0
NDUFS7	0	1
NDUFS8	1	0
COQ3	1	0
HBM	0	1
FAM198B	1	0
ZRANB1	0	1
ZRANB3	0	1
HBB	1	0
CHMP2B	1	0
MUC20	3	0
ATP9A	1	0
PCDHGB4	0	1
DENND2C	0	1
DENND2A	0	1
WWC3	0	1
WWC1	2	2
WHSC1L1	2	0
MICAL1	3	1
MICAL2	1	0
TP53AIP1	1	0
GPR108	1	0
SAFB	1	0
GRXCR2	1	0
ZNF415	1	0
PRPF40B	1	0
AVPR2	0	1
NCAPG2	3	0
RHBDL2	1	0
RHBDL3	1	0
PPP1R21	1	0
TMEM59L	0	2
LRRC61	1	0
NGLY1	1	0
DPEP1	0	1
FLG	3	1
HEPHL1	2	0
PCOLCE	1	1
LMX1A	1	0
OR6V1	1	0
SIK2	1	0
ACTR8	1	0
BAIAP3	1	3
ACTR6	1	0
ACTR2	0	1
CLUAP1	0	1
CST9L	0	1
GGT5	1	0
MYRIP	0	1
GP1BA	0	1
GTDC1	1	0
ANKS1B	1	0
ABI3BP	1	1
GNRH2	2	0
PITPNM3	2	0
ADAM18	2	0
MEPE	1	0
CPNE3	2	0
CPNE2	1	0
CPNE1	2	0
HS3ST3A1	1	0
CPNE6	1	0
CPNE5	1	0
WNT8B	1	0
OPALIN	0	1
DNMT3A	2	0
DNMT3L	0	1
RABEPK	1	0
U2AF1L4	1	0
SHANK1	0	1
UCP2	1	0
SALL1	1	0
ZDHHC16	1	0
ZDHHC13	2	0
PCSK1	1	0
PCSK7	1	1
UCP3	1	0
DUSP23	1	0
LEMD3	1	0
DUSP27	1	0
CD180	0	1
NCAN	1	0
ESPL1	0	1
C3orf17	1	0
LARP1	0	1
LARP7	1	1
ISM2	0	1
COL15A1	2	0
ODAM	1	0
DDX43	1	1
LMLN	0	1
ZGPAT	1	0
LGR5	1	1
LGR6	0	1
UBE2D4	0	2
UBE2D3	0	1
APOH	2	0
FAM151B	0	1
STX12	1	0
REG3G	2	0
REG3A	1	0
TMEM125	1	0
FRAS1	1	1
TMEM123	1	0
CCDC57	1	0
TMEM129	0	1
PAXIP1	1	0
NUDT7	2	0
NUFIP1	1	1
CABP5	2	0
CABP4	2	1
FBXO34	1	0
SLC35B2	1	0
PELP1	1	0
MBOAT1	0	1
SPSB2	2	1
SPSB1	1	0
HINT1	1	0
UNC79	0	1
OR2A2	0	1
OR2A5	2	0
OR2A7	0	1
ERICH6B	1	0
S100A7	1	0
BRWD1	1	1
S100A2	1	1
LONRF1	0	1
APBA1	1	0
IGDCC3	1	1
MORC2	1	0
MORC3	0	1
MORC1	0	1
PTPRZ1	0	1
DYSF	3	2
ATP13A1	1	0
VPS28	1	0
DYNC1I2	1	0
ATP13A5	3	1
ATP13A4	1	1
SKA1	1	0
SKA3	2	0
COL28A1	1	1
LRRIQ1	2	1
LRRIQ3	1	0
LRRIQ4	1	0
C1orf112	2	0
C1orf116	0	1
PLEKHO2	0	1
PLEKHO1	1	0
E2F4	1	0
E2F3	1	0
E2F2	1	0
MCF2	1	0
TUSC3	0	1
RLBP1	1	0
IZUMO4	1	0
PYCR1	1	1
FAM234A	0	1
WNT10A	1	0
WNT10B	1	0
GNG11	1	0
URB2	2	0
URB1	2	2
IL36B	0	1
LIPA	0	1
LIPE	1	1
IFITM5	1	0
LIPF	1	0
LIPH	0	1
LIPK	1	2
DFFA	1	0
DFFB	0	1
LIPN	1	0
REV3L	2	0
SEC24A	1	0
OR4A47	0	1
CSMD2	3	1
OGDHL	3	1
PYCRL	1	0
DPP4	2	2
C16orf96	0	1
MRPL40	0	1
C16orf92	2	0
HGFAC	2	0
C16orf91	0	1
TRIP4	1	0
NGB	2	0
ZNF695	1	1
FHAD1	2	1
ARFGAP3	2	0
ARFGAP1	2	0
LAMB1	1	2
LAMB3	3	0
LAMB2	2	0
LAMB4	5	0
CYSLTR1	0	1
MPHOSPH9	2	0
NEK4	2	0
NEK5	0	1
NEK3	0	1
NEK1	4	0
NEK8	2	0
GPR162	1	0
GPR160	1	1
DHPS	1	0
ZZZ3	0	1
CCDC3	0	1
ASTN1	0	1
CCDC7	0	1
COX7A1	1	1
CCDC8	1	0
PHEX	0	1
DYNC2H1	2	1
TMEM14B	1	0
MTHFD1	1	0
MGP	1	0
ITGA2B	1	0
STBD1	1	0
ADSL	1	0
SAMD4B	1	0
AS3MT	0	1
TIMMDC1	1	1
GAS2L3	0	1
ZNF343	1	0
ZNF431	0	1
ZNF430	1	0
ZNF345	0	1
ZNF432	2	0
ZNF438	2	0
RALGDS	0	1
CCDC190	1	0
CCDC191	1	3
DLL3	0	2
NUTM1	1	0
NUDT19	1	0
STX8	1	0
TM6SF2	1	2
KEL	1	0
STX2	2	0
STX5	1	0
SLC4A11	1	0
SLC4A10	1	0
ANPEP	1	0
STAB1	4	1
STAB2	3	1
KIAA0232	1	0
RNFT2	1	1
ECE2	2	0
LGI2	1	0
TRMT2B	1	0
ARHGAP44	1	0
DRG1	1	0
CFHR4	0	1
ARHGAP42	0	1
CLIC1	1	0
ICA1	2	0
AP1B1	0	1
GNPTG	1	0
RABL2A	0	1
DRGX	1	0
TXLNB	1	0
HRASLS5	1	0
TCP11	1	0
TCP10	1	0
WFIKKN1	1	0
FEZ1	0	1
TMEM145	1	1
TESC	1	0
ACADVL	0	1
TSEN54	0	1
KRT35	0	1
KRT34	1	0
KRT36	1	0
IL20	1	1
PKDCC	1	0
IL22	0	1
KIF2B	1	0
IL12RB1	0	3
IL12RB2	0	1
BRCA1	2	0
OR4N5	1	0
ACOT8	0	1
ACOT7	0	1
ACOT4	2	0
ADCY4	1	0
ADCY5	1	0
ADCY6	1	2
ADCY7	3	0
ADCY3	1	0
KIF25	1	0
KIF24	0	1
ADCY8	1	0
ADCY9	0	1
ZACN	2	1
LY6G5C	1	0
XRCC1	1	0
XRCC2	1	0
XRCC4	2	0
SMURF2	1	0
CLEC7A	1	0
MEIS3	1	0
NARS	1	0
PCDHAC1	1	0
NARF	0	3
GPR78	1	0
RALGPS1	1	0
ESPNL	1	0
PAPD5	1	0
KIR3DL1	0	1
RPARP-AS1	1	0
LRBA	2	0
CD274	1	0
LCMT2	2	0
NOS3	0	1
ADCY10	1	0
DGCR6	1	0
ADGB	0	1
OPTN	2	0
JMJD8	1	0
SCRG1	0	1
FTO	1	0
PITRM1	2	0
CCDC36	1	0
SLFN11	1	0
PLA2G2A	1	0
APPL1	0	1
APPL2	1	0
PLA2G2D	1	0
CAPN14	1	0
CAPN13	1	0
CAPN12	2	0
CAPN11	1	0
CAPN10	1	0
SLC35D2	0	1
MLNR	1	0
SARS2	1	1
HS3ST6	2	0
IL1RAPL1	1	0
THUMPD3	0	1
THUMPD2	1	0
CHORDC1	1	0
PXDNL	2	0
NUP188	1	2
SYNJ1	1	0
PHOSPHO2	1	0
GLT8D1	1	0
SYNJ2	5	1
OR2C3	1	0
KERA	0	1
ZNHIT1	1	0
REG1A	1	0
REG1B	0	1
FAM90A1	0	1
LY9	1	0
GTPBP4	1	0
PCDHA6	2	0
PCDHA5	1	0
ABHD14A-ACY1	2	0
BCL9	1	0
LYRM1	1	0
ZP3	1	0
NBPF7	1	2
OAS2	1	0
TTYH1	5	0
TTYH3	1	0
STK11IP	0	3
OASL	1	0
SERPINB9	1	0
CSNK1G1	1	0
ANKK1	1	0
SERPINB3	1	0
SERPINB5	1	0
SERPINB6	2	0
FAM76B	1	0
FAM76A	0	1
PMF1-BGLAP	2	0
ATP8B3	1	2
ATP8B2	0	1
EXD3	1	1
ATP8B4	0	1
ROBO3	2	0
SIGLECL1	3	0
DES	1	0
DPPA2	0	1
DEK	1	0
DPPA4	1	0
LY75-CD302	2	0
KLHDC1	2	0
LRP5L	1	0
ADAMDEC1	2	0
POLK	2	1
HDDC3	1	0
INADL	1	0
GBA2	2	0
DDX60L	1	2
SPATA13	1	0
TMEM99	0	1
KLHL30	0	1
KLHL31	1	0
TMEM92	1	0
SPATA19	0	1
AGAP11	1	0
TMEM94	2	0
SGTA	1	0
TRIM48	1	0
TRIM45	1	0
TRIM42	0	1
PEX1	0	1
TBPL1	1	0
PEX6	0	1
ACE	2	0
NEB	7	2
ATP5J	1	0
ME1	2	0
ME3	3	0
GNAI1	1	0
MPZL2	2	0
MPZL3	1	0
TBK1	0	1
OR4L1	1	0
SLC7A9	1	0
AFMID	2	0
CITED1	0	1
MTHFS	1	0
TOP1MT	2	0
DTNB	1	1
DTNA	0	1
PRB2	1	0
CSNK1A1L	1	0
RIN3	1	0
RIN2	1	0
MET	1	0
NOX5	3	0
LALBA	1	0
RIPK1	1	0
RIPK3	0	1
RIPK2	1	0
RIPK4	1	0
CLPB	1	0
SRCIN1	1	0
CRABP2	1	0
SVEP1	3	1
ZNF417	1	0
TSSC4	2	0
GGT7	1	0
MCOLN3	1	0
WIPF2	1	0
RASA2	2	0
RASA3	0	2
ACTN2	1	0
PTPRU	1	1
PTCH1	0	1
PTPRS	1	1
PTPRR	1	0
PTPRQ	1	0
TINF2	0	1
EZR	2	0
PTPRD	1	0
PTPRB	1	0
PVRIG	0	1
PTPRJ	1	1
PTPRH	5	1
IFT20	1	0
CPD	1	0
CPZ	1	0
PPP4R3B	1	0
SLC5A12	3	0
DMPK	1	0
TAF1A	1	0
ABLIM1	1	0
OCSTAMP	1	0
UBXN7	1	0
LMTK2	1	0
F7	2	0
BIVM-ERCC5	0	1
CFAP161	1	0
HMGN1	1	0
MX2	1	0
MX1	1	0
CHL1	1	2
IFIT3	1	0
IFIT1	2	0
KIAA0368	1	0
EFTUD1	0	3
BORCS7-ASMT	0	1
DAOA	1	0
GGTLC1	1	0
ZFP28	1	0
GPS1	1	0
BRCC3	1	0
ARL5C	0	1
PSAP	1	0
WDR35	0	1
KRT16	1	0
WDR36	0	1
WDR31	0	3
WDR33	1	1
GABRD	1	0
CRIP1	1	0
EIF4A3	2	0
CRIP2	1	0
MIA3	1	0
GIGYF2	0	2
NBPF8	1	0
TLE3	1	1
NBPF3	1	0
TLE4	1	0
SPTA1	2	0
AUNIP	1	0
ZNF816-ZNF321P	1	0
NUDT16L1	0	1
PLP2	1	0
CDC6	0	1
CDC7	1	0
PKLR	1	1
PCDHB12	1	0
PCDHB16	1	0
PCDHB15	1	0
PCDHB14	0	1
C10orf10	0	1
NAT8	0	1
SPATS2L	1	0
NAT6	1	0
CCBL1	1	0
KCNC3	1	0
TMEM252	2	0
KIAA2026	1	0
NGFR	2	0
CPSF1	0	1
OR3A2	0	1
OR3A3	1	0
SIPA1L1	1	0
APCS	0	1
SIPA1L3	1	0
SIPA1L2	1	0
TTLL5	2	1
TTLL6	0	1
TTLL1	1	0
LTBP2	1	1
TTLL3	1	1
TTLL9	2	1
ZNF267	1	0
SUFU	0	1
APC2	0	1
PLA2G4D	0	1
CRAT	0	1
OR8H3	1	0
LRWD1	1	2
SUPV3L1	1	0
CMTM3	0	1
MLPH	1	0
TSPAN19	1	0
COL11A1	1	1
COL11A2	3	1
TSPAN15	1	0
REXO2	1	0
REXO4	1	0
SLC25A11	1	0
TUBA3C	1	0
TUBA3E	0	1
USP29	1	0
CCDC14	0	1
EAF1	1	0
EAF2	0	1
CCDC17	1	0
NDUFA12	0	1
CCDC13	1	0
CCDC18	0	2
ZNF649	0	1
KIAA1644	0	1
ALDH1L2	0	2
ALDH1L1	2	0
ASCC2	1	0
ZNF280A	1	1
VIT	1	2
MMAA	1	1
MMAB	3	0
TYR	1	0
ALG8	1	0
PDXK	1	1
ALG3	1	0
UGT3A1	1	0
WIF1	2	0
KIAA1324L	1	0
INSL6	2	0
GCC1	1	0
RASGEF1C	1	0
SMYD4	0	2
SMYD5	1	0
TRDMT1	1	0
IRF7	2	0
IRF5	0	1
IRF8	1	1
LY75	1	0
CLK1	1	0
CLK2	1	0
CLK3	1	0
SNX27	1	0
SNX24	2	0
PLA2G4C	0	1
PANX1	0	1
ZBTB17	1	0
ADAP1	2	0
TMEM150B	0	1
C1orf159	0	1
DDX19A	1	0
LYSMD3	1	0
LYSMD2	1	0
KLHL17	3	0
DAB2IP	2	0
SPATA32	0	1
TRIM69	0	1
C4orf27	3	0
TRIM60	1	0
TRIM63	1	0
TRIM67	1	0
TRIT1	1	0
ITK	0	1
C2orf61	0	1
CNBD1	1	0
NAGPA	0	1
LCAT	1	0
HIP1	0	2
ZNF398	1	1
ARAP3	1	0
ARAP2	2	0
ARAP1	2	0
TTPA	0	1
KLKB1	1	0
OR51E1	1	0
RTEL1-TNFRSF6B	2	0
CEACAM19	2	0
LMAN1L	2	0
HMHA1	0	1
CTNS	0	1
PHYH	0	1
ZGRF1	2	0
AZIN1	1	0
NOTCH1	2	0
NOTCH2	1	0
AZIN2	3	0
ZNF658	1	0
C4BPA	0	1
MCU	0	1
ZNF653	1	0
HSF5	1	0
HSF4	2	1
NISCH	1	0
RAPGEF4	1	1
RAPGEF5	1	1
RAPGEF6	1	1
N4BP2L2	0	1
C7orf50	1	0
RAPGEF3	2	0
RNF175	0	1
POC1B	1	0
PARK7	1	0
RORC	2	0
DNAJB11	1	0
NXPE1	1	0
NXPE4	1	0
ZNF471	0	1
DMTF1	1	0
GUSB	2	0
MDM1	1	0
SFI1	1	1
KIT	2	0
KPNA7	0	2
CCM2L	1	0
KPNA5	1	0
IFT43	1	0
IFT46	1	0
RFX6	0	1
SPATA18	0	2
GOLT1B	1	0
DVL3	1	0
GLDN	1	0
GLDC	1	0
PC	1	1
NINL	2	0
FCN1	0	1
DHRS12	1	0
TRRAP	1	0
GPR89B	0	1
CR2	0	1
ASPSCR1	2	0
TNFRSF1B	2	1
LGMN	0	1
FAM174B	1	0
GPD1L	2	0
SOGA1	1	0
WDYHV1	1	0
DOHH	1	1
CAPS2	0	1
EHMT2	1	0
STOX1	1	1
MARK2	1	0
MARK3	2	0
CCDC12	0	1
TPD52L2	2	0
EFCAB13	0	1
EFCAB14	0	1
SRP68	0	2
CHRD	1	1
WDR17	5	1
WDR19	2	0
AOX1	3	1
TIMM9	1	0
ZMYND15	0	1
BCL9L	1	0
KRT33B	0	1
KRT33A	0	1
AMBP	1	0
AMBN	1	0
ZFP42	0	1
RHOBTB2	1	0
RHOBTB3	1	0
RHOBTB1	1	1
MYADML2	1	0
INO80B	1	0
CCDC13-AS1	1	0
DIS3L2	2	0
UTP14A	1	0
TNFRSF21	1	0
LOC100630923	0	1
KCNE1	0	1
KCNE5	1	0
LDLRAD1	1	0
HPCA	1	0
C5orf24	1	0
LIG4	1	0
CSNK1D	1	0
CSNK1E	1	0
BDP1	2	1
APEH	1	0
DEFB135	1	0
EHBP1L1	1	0
UMODL1	0	2
ADAMTS20	4	0
KCTD10	1	0
ANKUB1	1	0
CSPG4	1	0
SCGB2A1	1	0
KRTAP10-6	1	0
KCTD19	1	0
KCTD18	2	0
KRTAP10-3	0	1
ZKSCAN2	1	0
ZKSCAN4	0	1
ZKSCAN7	1	0
ATP13A3	0	1
GLIS3	0	1
SLC25A37	1	0
SLC25A36	1	0
SLC25A31	2	0
GPBAR1	1	0
IGSF10	2	0
C2CD2	0	1
ADGRF1	1	0
ADGRF3	1	0
HCAR3	1	0
HCAR1	0	1
TAF5	0	1
TAF2	1	0
PGBD1	1	0
G6PC	1	0
TAF8	1	0
POMT1	1	1
ALAD	1	0
STOM	1	0
LRRCC1	1	0
LGALS12	0	1
SMIM7	1	0
VSIG8	1	0
CRELD2	1	0
TCF25	1	1
PDCD5	1	1
PDCD2	0	1
MINA	1	0
PBLD	1	0
ERP44	2	0
SERPINF1	1	0
OR6C6	1	0
ARFGEF2	1	0
ARFGEF3	1	0
VPS26B	0	1
ZNF101	1	0
ZNF100	2	0
SREBF2	0	1
AKR1D1	0	1
PDE9A	1	0
CIT	1	0
PDE2A	1	0
THPO	0	1
LRP1B	2	0
MTA1	1	0
RBBP8NL	1	1
CUBN	3	0
GAPDHS	1	0
GPC2	1	0
HEPH	2	0
MTAP	0	1
BBS9	0	1
SEC22A	1	0
BBS1	1	0
BBS4	1	0
BBS7	1	0
C2orf49	0	1
C2orf42	1	0
ELANE	0	1
AGL	3	2
NIPA2	1	0
CELA2A	1	0
RUBCN	1	0
CELA2B	2	0
PDCD11	2	0
SLC28A2	2	1
TMEM54	1	0
SCLY	0	1
ZSWIM8	1	0
GCOM1	2	2
TMEM51	1	1
ENKD1	1	1
DIMT1	3	0
PIK3C3	1	0
ZNF676	0	1
ZNF675	2	1
ORM1	1	0
ZNF671	0	1
PARP16	0	1
PARP15	1	0
PARP10	2	0
EYS	5	2
ACLY	1	0
EVL	0	1
OR1B1	0	1
ALDH3A1	0	1
ZNF451	2	0
SEMA4C	1	0
BACH2	1	0
LSR	1	0
LSS	1	0
COL1A2	1	1
KCNIP2	0	1
PRSS55	1	0
PRSS53	2	0
PRSS58	1	0
MOGAT2	1	1
MOGAT3	1	0
MOGAT1	2	1
RBM12B	1	0
ANAPC5	1	1
RPS6KA1	0	1
SH3D19	1	0
PSMD12	1	0
FTCD	2	0
UTP20	1	3
NMI	0	1
GANAB	0	1
NPHP3	0	1
NPHP1	1	0
ZWILCH	1	0
ARF3	1	0
ARF5	1	0
MYLK4	4	0
MYLK2	1	0
MYLK3	1	1
RGPD3	2	1
RGPD4	1	0
MOB4	1	0
RAB11FIP3	2	0
LOXHD1	2	1
BPIFA2	1	0
BPIFA3	1	0
KIAA1524	2	1
METTL20	1	0
IFIH1	1	1
SLCO1B7	0	1
EEF1A1	1	0
FYCO1	1	1
SPNS1	1	0
SPNS3	0	1
SPNS2	1	1
ARL14	1	0
ARL16	1	0
SLITRK3	0	1
ANGEL2	1	1
CLIP1	1	0
MNDA	1	0
HEXDC	1	0
DHRS7B	0	1
CA12	0	1
DMTN	1	0
FPGS	0	1
VMA21	1	0
SNX20	1	0
EIF4E3	0	1
TBL1X	1	0
RAB26	1	0
GLRA2	1	0
DZIP1L	0	1
ASAH2B	0	1
WDR78	0	1
FAR1	1	0
WDR72	1	0
WDR77	1	0
COL23A1	2	0
AGMO	1	0
NQO2	1	0
SFMBT1	1	0
PRPF6	0	1
PCF11	1	0
CLEC1A	0	1
C5orf47	1	0
C5orf42	4	1
RFFL	1	0
LEFTY2	2	0
LEFTY1	1	0
CYP3A7-CYP3A51P	1	0
KIAA0930	1	0
CDON	2	0
PAK6	0	1
FAM122A	1	1
OR4C15	0	1
CEP97	0	1
DEFB116	1	0
CYP2D6	1	0
MFSD2A	1	0
DEFB119	0	1
LCN15	2	0
DMBT1	5	0
AXDND1	1	1
PRKG1	1	0
TNS3	1	0
C10orf55	1	0
TNS1	0	1
TNS4	1	0
ZNF778	1	0
ZNF774	1	0
GLYCTK	1	0
NUBP2	1	0
SHISA5	1	0
NUBP1	2	0
PFN4	1	0
COX11	1	0
TRIM3	1	0
TRIM2	0	1
TRIM5	0	1
TRIM7	0	1
ANKRD13D	1	0
RGS19	0	1
SCN10A	1	1
MCTP1	1	0
MCTP2	1	0
CSF1R	1	1
TPM1	1	0
FBXW8	1	0
FBXW9	2	1
C22orf39	2	0
FAM21C	2	0
TAGLN	1	0
FBXW5	0	1
FBXW7	1	1
KIAA1683	2	0
ANKLE1	1	0
TGFBR1	1	0
PLPP2	2	0
SH3RF2	2	0
SH3RF3	1	1
FAM159B	1	0
FAM159A	1	0
SSX2IP	1	0
ANKLE2	1	0
PCIF1	0	1
TJP2	3	1
TJP3	1	1
TJP1	0	1
TTN-AS1	2	0
BABAM1	1	0
GKAP1	1	0
SH3PXD2B	2	0
TUB	1	0
CCDC173	2	0
KLHL11	0	1
CHPF2	1	0
AGRN	1	2
SMARCA4	1	1
POMZP3	1	0
FYB	2	0
FYN	0	1
GPHA2	0	1
RUFY1	2	0
RUFY2	1	0
RUFY4	1	0
NLE1	0	1
CHCHD1	0	1
CYTH3	1	0
MYH7B	3	3
DPH6	1	0
CALCR	0	1
CANT1	0	1
CALCB	1	1
WBP4	0	1
CKM	2	0
PTGS1	1	1
PAH	0	1
ACSM3	1	0
ACSM4	1	0
ACSM6	0	1
TAF4B	0	1
CUL9	1	0
DCT	0	1
TRIM29	1	0
CDH23	2	0
CREB3	1	0
CDH26	1	0
PER3	2	0
PXYLP1	1	1
PPDPF	1	0
AES	1	0
DNAJC28	1	0
DNAJC27	1	0
MROH2B	4	0
SP140	0	1
NTSR2	0	1
DNAJC21	1	1
ARHGAP9	0	1
ARHGAP4	0	1
ICOSLG	1	0
C1QTNF3-AMACR	1	0
ANXA11	2	0
ANXA10	0	1
TMEM72	1	0
HSPA4L	0	1
HEMGN	0	1
MRPL4	1	0
PRAC2	2	0
ZFAT	1	0
ZNF613	0	1
MS4A10	1	0
MS4A12	1	0
MS4A14	3	0
BAG6	3	0
OR1L8	1	0
BAG4	1	1
BAG5	1	0
SH2D1B	1	0
OR1L1	1	0
RTKN	1	0
MSRB3	1	0
CTDP1	2	0
SLC34A1	1	0
ZNF385A	1	0
CBLN3	1	0
ZBTB26	1	0
PDHA2	1	0
CPSF3L	2	0
PDHA1	0	1
FSCN2	1	0
SLPI	0	1
AIM1L	1	0
CKMT2	1	0
RPS6KC1	3	1
MRPS14	1	0
IDO2	1	0
IDO1	0	1
CAMK1G	1	0
NLRP12	1	1
ECM2	2	0
ECM1	1	0
HHAT	0	1
LYPD6	0	1
CATSPER4	4	0
AMHR2	0	1
CATSPER2	0	1
CATSPER3	1	0
ANKRD30A	3	3
WTAPP1	1	0
ANKRD30B	1	2
RGS2	1	0
RGS3	1	1
APMAP	1	0
PEAK1	1	0
KANK4	1	0
KANK2	1	0
KANK3	2	0
RDH13	1	0
FAM178B	1	0
WDR5B	1	0
TARSL2	2	0
ENOSF1	1	0
NALCN	1	0
ZSCAN29	1	0
NUCB2	2	0
ZSCAN23	1	0
TRHDE	0	1
C9orf24	1	0
IFI35	1	0
TDRD6	2	1
IFI30	2	0
ABHD8	1	0
ABHD2	0	1
ABHD3	1	0
ABHD1	2	1
ABHD6	0	1
WDR54	1	0
WDR53	1	0
MBTPS1	1	0
EIF4G3	0	1
EIF4G1	1	0
WDR59	1	1
NR1I3	1	0
NR1I2	2	1
FAT1	2	0
ULBP2	1	0
ULBP3	1	0
PSG8	0	1
PSG6	1	1
UQCC1	2	0
PSG3	1	0
HOXC4	1	0
TMEM248	1	1
UROC1	1	0
COL27A1	3	0
MFSD3	4	0
GATSL3	1	1
POLR2C	0	1
LSM3	1	0
POLR2K	0	1
GTF3A	1	0
ASCC3	2	1
OSER1	1	0
DDA1	1	0
GAMT	1	0
MAPK14	1	0
MAPK15	1	1
MAPK11	0	3
MAPK13	1	0
FZD3	1	0
IQUB	2	0
HUS1	1	0
CACNB1	2	0
DHCR24	0	1
ASH1L	1	0
ATP12A	2	0
PLCD1	1	0
HIST1H1C	1	0
ANKZF1	1	0
SOS2	1	0
TACC2	1	1
PICK1	1	0
MRTO4	3	0
KIF20B	1	0
TMEM232	0	2
MKI67	2	0
CLEC4D	1	0
CKMT1B	1	0
GNAT3	1	0
C14orf80	2	0
TMIGD3	0	1
TMIGD2	0	1
NUP43	1	0
ZNF556	1	0
ZNF554	1	0
C22orf15	1	0
SIN3B	0	1
ZNF558	1	0
SIN3A	1	0
GTF2H4	0	1
TVP23B	1	0
DEFB126	1	0
ALDH1B1	1	2
CNTRL	0	1
TAB3	1	0
PCDH1	1	0
RPL34	1	0
RPL31	1	0
TARBP2	1	0
TARBP1	1	1
SMARCC2	1	0
BUB1B	3	0
ABHD10	1	0
TMCO2	0	1
TMCO4	2	0
TMCO6	1	0
ANKIB1	1	0
KIAA0319	1	0
EEF2K	1	0
SDF2	1	0
LHX8	2	0
MIB1	1	0
MIB2	2	1
TOR3A	1	0
SLC38A1	1	0
B3GALT1	1	0
SLC38A2	1	1
SLC38A8	1	0
STK4	1	0
CSF3R	1	0
CYP3A7	1	0
CYP3A5	2	1
CXCL16	1	0
UBE4B	3	0
OR13C2	1	0
C7orf57	0	1
NTN1	1	0
RAPGEF1	1	0
LRIT2	1	0
LRIT1	1	0
STIP1	1	0
C16orf62	2	1
CHIC2	1	0
UACA	1	1
TBC1D21	1	0
TBC1D20	1	0
TBC1D26	1	0
ATR	1	1
GUCY2C	1	0
GUCY2D	1	0
SENP5	1	0
SENP2	0	1
C21orf58	0	1
ING1	1	0
NOTUM	1	0
ZNF354C	0	1
VASH1	1	0
WDFY4	3	1
WDFY3	1	0
WDFY1	1	0
GFPT2	0	1
ECHDC3	0	1
INA	1	1
ECHDC1	1	0
ACP6	1	0
SLC2A11	3	0
ANKRD35	3	0
ANKRD36	6	0
ANKRD37	0	1
ANKRD33	1	0
NCOA3	0	1
TMEM11	1	0
NCOA4	1	0
TMEM19	0	1
NT5C3B	0	1
BSN	2	0
GSG2	2	0
ABCG2	1	0
LRIG3	1	0
PRAM1	1	0
SLC27A3	2	1
AK9	1	0
AK8	1	0
ACPP	2	0
AK3	1	0
AK2	1	0
TBCE	0	1
TBCD	1	0
UGT2B28	0	1
NCKAP1L	3	0
OR1N2	1	0
OR1N1	1	0
GEN1	1	0
ZNF497	0	1
ERF	1	0
ERG	2	0
ZNF493	2	0
SH2D3A	1	0
EPS8	2	0
PARM1	1	0
TRA2A	1	0
SLC24A4	1	0
PRSS12	0	1
NCR3	2	0
NCR2	0	1
FBN1	1	0
MEX3D	1	0
AOAH	0	2
A1CF	1	0
ITLN1	1	0
TPSD1	0	1
FRYL	0	1
STYK1	1	0
IDI2	1	1
SPTB	2	0
ESYT1	1	0
ZXDC	1	1
UBXN11	2	0
DNTTIP2	1	0
UBLCP1	1	0
ANKRD36B	1	1
MTMR6	0	1
MTMR3	1	1
MTMR2	1	0
NAAA	1	0
FCHSD1	0	2
FCHSD2	1	0
TMEM256-PLSCR3	1	0
CNFN	1	0
EXOSC8	1	0
EXOSC2	1	0
EXOSC3	1	1
EXOSC7	1	0
ADAMTSL2	0	1
ADAMTSL1	1	1
ADAMTSL4	0	1
ADAMTSL5	2	0
TULP2	1	0
TULP3	1	0
TULP1	1	0
TULP4	1	2
NID2	3	0
NID1	0	1
FARP2	2	0
FARP1	1	0
ATP13A4-AS1	0	1
OR2A12	1	0
SARDH	3	0
DEPDC7	1	0
DEPDC5	1	0
PSMB10	0	1
PAOX	1	0
SCYL1	0	1
STXBP5	1	1
[truncated: 4,046 more rows]

## Sheet: missense_case_control_count
Gene	Case	Control
RNF14	1	0
DUOXA1	2	2
RNF17	5	0
RNF10	2	1
RNF13	1	1
REM1	1	1
C16orf13	4	2
RPEL1	1	0
UCHL5	1	0
UBE2Q2	1	0
CHMP1B	1	1
PMM2	1	1
PMM1	3	1
ASS1	3	1
FHIT	1	0
SPX	1	0
ZNF709	3	0
ZNF708	3	0
ZNF879	1	0
ZNF878	3	3
LRRTM4	1	0
ZNF703	3	0
SPR	1	0
ZNF700	3	2
ZNF707	1	0
CAMK4	3	1
ZNF704	4	0
ZC3H10	1	0
ZC3H13	4	4
RNF115	1	0
ZC3H15	0	1
ZC3H14	4	1
SPN	0	1
HMGCLL1	1	1
ZC3H18	3	1
GRIN1	2	1
FOXQ1	2	1
DHX9	1	1
TCOF1	8	4
NSRP1	1	1
NUP98	12	0
XPC	3	2
SP1	1	0
XPA	1	0
SP3	1	2
SP4	2	1
SP5	1	0
SP7	1	0
TACSTD2	1	1
GOLIM4	0	3
OPA3	2	0
OPA1	5	0
RAB40C	1	0
RAB40B	2	1
RAB40A	1	1
COL7A1	12	7
KLLN	1	0
OVCH2	0	1
OVCH1	4	1
RPRD2	6	2
SPPL2A	2	2
SPPL2C	2	0
NSL1	1	3
ITGA9	3	3
UGCG	2	0
MYO3B	6	1
ATP2A1	5	2
ATP2A2	2	0
ATP2A3	6	2
ITGA1	3	2
ITGA2	3	2
NOP2	2	2
ITGA4	4	2
ITGA5	2	4
ITGA6	6	1
ITGA7	6	2
TRHR	2	1
DENND4A	3	3
DENND4B	3	2
DENND4C	9	1
SWAP70	2	1
RARRES1	1	1
UFSP1	2	1
ZNF664-FAM101A	0	2
PHLDA2	2	0
TAP2	3	2
GAP43	1	1
NABP1	2	1
PAMR1	6	0
FBXL13	5	5
FBXL12	3	0
TIPRL	1	1
FBXL14	2	1
FBXL17	0	1
HRH1	2	3
FAM169A	1	3
FBXL18	2	0
FAM169B	3	0
GHDC	1	2
SDK1	12	6
SDK2	11	5
TPRN	4	4
THSD4	8	1
THSD1	2	0
CHST9	2	1
CHST8	5	1
COL4A5	5	2
COL4A4	4	2
COL4A3	6	1
COL4A2	2	1
COL4A1	13	2
OR8J3	1	2
CHST1	1	1
CHST3	3	1
CHST2	1	0
CHST5	3	1
CHST4	3	0
CHST7	1	0
CHST6	6	0
ITGAX	9	2
MLNR	1	1
C16orf90	2	0
HLX	3	0
HLCS	5	0
NOG	0	1
ITGAV	4	3
PREP	1	1
ITGAL	1	1
ITGAM	5	0
HLF	2	0
ITGAD	6	2
ZNF701	4	0
FAM134A	2	2
SMAD9	4	0
TRERF1	5	4
EEF2K	7	3
LRPAP1	3	1
SMAD6	1	0
GOLPH3L	1	0
SMAD1	2	0
AFTPH	4	1
SMAD3	0	1
MUS81	6	1
AMMECR1L	1	0
TMPRSS11A	2	1
TMPRSS11B	2	0
IGF2R	11	3
TMPRSS11D	3	1
TMPRSS11F	0	1
PRR14L	7	6
ABHD14B	2	2
RAD21L1	4	1
PLRG1	1	2
SLC36A3	1	0
SLC36A2	2	1
SLC36A1	2	1
LXN	2	0
ST13	1	0
ERICH6	6	0
ERICH5	1	2
ERICH4	1	0
ERICH3	10	1
ERICH1	6	4
C14orf119	0	2
ART1	1	1
ART3	2	0
ART5	1	0
ART4	2	0
RNF111	8	3
TCEA3	1	0
TCEA1	1	0
KDM2A	1	2
COX4I1	1	1
BFAR	1	0
CRTAM	1	1
ABCD2	4	1
LAPTM4B	1	0
OR6P1	4	0
CCDC116	4	3
CCDC117	1	1
CCDC114	3	2
RLF	7	3
CCDC112	2	1
MCF2L	8	4
CCDC110	3	1
LEO1	3	0
MTCL1	13	8
ATP1A4	7	5
ATP1A3	2	0
ATP1A2	4	2
MGRN1	5	1
SPHK2	4	0
SPHK1	3	1
DPT	2	1
CUEDC1	5	1
CUEDC2	0	1
IPO13	1	1
CPEB4	2	1
C11orf98	1	0
CPEB1	3	2
CPEB3	1	0
SBSPON	0	2
BEGAIN	0	2
RBMXL3	7	3
SRBD1	5	2
ABAT	4	1
HCAR1	3	1
ZNF780A	3	0
ZNF780B	4	1
TP53TG5	3	0
RHEBL1	0	1
C2CD5	4	0
IFT80	2	3
IFT81	1	1
IFT88	4	2
POU5F1B	1	0
SP2	3	2
KISS1R	1	0
MCM10	3	1
NUP93	4	0
IGFBPL1	3	2
ATG4C	2	3
ATG4B	1	1
ATG4A	1	0
THUMPD2	2	3
CREB5	1	0
ATG4D	3	3
PHOX2A	1	0
LRGUK	5	0
UPK2	1	0
CFH	5	2
CFI	5	2
PNP	0	2
ANKFY1	6	1
CFB	3	0
OR5P3	2	0
OR5P2	2	2
LHPP	1	2
CDKAL1	1	1
PNN	4	1
ATP6V0E2	2	0
OSER1	0	2
AAAS	3	3
SIDT1	6	2
SIDT2	4	0
CDH24	6	2
SIX4	5	1
SIX5	6	1
SAGE1	4	2
MR1	2	0
CNPY4	1	0
CNPY3	1	0
CNPY2	2	0
PRIMPOL	3	1
KNDC1	8	3
HMG20B	2	1
GLT8D2	3	0
AAGAB	2	1
C4orf19	1	2
C3orf79	1	0
C4orf17	3	0
C3orf70	1	3
SHOX2	0	1
ZFP82	3	0
CHFR	4	1
KIAA0430	7	1
SYPL1	1	1
FAM81A	2	2
SYPL2	3	1
RFX8	1	1
RFX4	2	4
RFX5	1	1
RFX6	1	1
RFX7	6	1
NRXN3	4	2
NRXN2	7	2
NRXN1	7	3
RFX3	4	0
YDJC	2	0
IBA57	2	1
APC	7	4
TMEM179B	1	0
ETV3L	1	3
XPNPEP1	0	1
XPNPEP2	1	0
UQCRC1	1	1
GGCX	3	1
PAPLN	8	10
RETSAT	4	3
ZNF57	4	1
KHDRBS1	3	0
KHDRBS3	1	1
KHDRBS2	3	0
LHCGR	2	1
OR1Q1	1	0
GPR78	4	1
DPYSL4	6	0
TARS2	1	1
DPYSL2	1	1
PHIP	4	1
GPR17	4	1
KRTAP10-12	4	0
KRTAP10-10	3	0
IGFBP2	3	0
IGFBP1	1	0
HBE1	1	0
IGFBP7	2	0
IGFBP4	1	0
IGFBP5	2	0
CYP1B1	4	0
GJA3	1	2
GJA4	2	2
GJA5	3	0
GJA8	6	0
GJA9	0	1
OR4D1	1	0
KDM3B	5	2
ZNF117	5	2
ZNF114	1	1
KDM3A	5	3
ZNF112	3	0
SEZ6L	7	1
PPP6R3	3	1
TMC4	2	0
ITGA8	5	2
TMC6	6	2
TMC7	4	1
APIP	1	0
TMC1	2	2
TMC2	3	1
TMC3	6	2
EIF2B4	1	0
EIF2B5	3	2
EIF2B2	1	1
EIF2B3	1	1
PRKAR2A	2	1
CRYBG3	5	1
TXNIP	1	0
MLF1	1	1
QPRT	2	0
IFT140	4	6
MLF2	3	0
TMEM14C	0	1
FAM157A	3	0
TMEM14A	2	0
MECOM	2	1
RSPH3	3	2
RSPH1	4	1
IFI16	1	2
KRTAP5-1	3	2
PNISR	4	1
MYT1L	2	0
CFHR2	1	1
PHACTR4	1	3
CLIC4	1	0
CLIC5	4	0
NLGN2	3	0
OR2K2	1	0
CFHR4	3	2
CFHR5	3	1
KRTAP2-1	1	0
RIT2	1	0
TMEM147	1	0
ASGR1	1	2
ASGR2	2	0
TMEM144	2	0
FOXL2	1	1
TMEM140	1	0
SF1	0	2
BPNT1	0	1
API5	1	1
PRDM8	2	0
RTKN2	6	0
SOWAHB	5	2
SOWAHC	3	0
FANCI	6	1
OR5AN1	0	1
PCDHA8	6	1
KIAA1191	0	1
FER1L6	8	5
PPP2R4	1	0
FER1L5	12	4
C19orf24	0	1
C19orf25	2	0
MYBL1	0	2
SMOC2	3	1
NR1D2	1	1
MYBL2	2	1
ITGB1BP1	0	1
MUC20	1	2
ITGB1BP2	1	0
ZNF7	1	1
ZNF2	2	1
CTCFL	5	0
PHLDA1	2	1
ZNF8	3	1
C11orf16	4	1
ZAP70	4	3
SYNDIG1	2	0
OGFR	3	1
NEMP1	1	0
RAC3	1	1
NEMP2	2	0
SBDS	1	1
RCL1	2	1
VCL	1	1
MRPS18A	1	1
VCP	1	0
CPLX3	1	0
CPLX1	0	1
AP2A1	4	2
CPLX4	0	1
AP2A2	3	0
VCX	1	1
NIM1K	1	0
CADPS	5	0
MRPS18C	1	0
PBX2	2	1
PBX1	1	0
AIRE	1	4
TMOD2	3	2
NSUN2	5	1
NSUN5	4	1
NSUN4	1	0
NSUN7	2	1
NSUN6	1	0
PRAMEF4	1	0
TUBG2	2	1
FAM71F1	2	0
PRAMEF1	3	0
PRAMEF2	2	1
FAM71F2	3	0
PTCH2	6	2
TARP	2	0
TIMM44	2	0
TUFM	3	0
KMT5B	1	2
RAD9B	1	1
RAD9A	3	2
KMT5A	0	1
ERGIC3	3	0
CDR2L	5	3
ERGIC1	0	1
CLEC14A	5	0
S100PBP	3	1
B3GAT3	2	1
B3GAT1	0	2
TST	2	1
CPPED1	2	1
CALM2	1	0
TTC30A	1	1
TTC30B	4	4
SPG20	4	2
GSDMA	2	0
GSDMB	5	1
GSDMC	5	0
GSDMD	5	1
HRH4	3	0
DLGAP2	16	2
DLGAP3	3	5
DLGAP1	4	1
DLGAP4	7	1
DLGAP5	4	3
BRDT	4	2
HRH2	1	1
NPEPL1	4	2
HRH3	2	0
CDX2	3	0
OIP5	1	0
CLCN3	1	1
CLCN2	7	3
CLCN1	2	1
CLCN7	3	2
CLCN6	3	1
CLCN5	2	1
FBXL19	0	1
BRD8	5	0
BRD9	4	0
BRD4	2	0
BRD7	4	0
BRD1	3	1
BRD2	2	0
BRD3	4	1
DNAJA3	3	4
PTPN18	2	1
DNAJA4	5	2
LRFN2	3	1
PTPN13	13	7
PTPN12	3	1
PTPN11	1	1
LRFN1	2	1
PTPN14	5	1
GALR3	2	1
GALR2	1	0
MAGEL2	6	2
UTRN	14	3
LYAR	1	1
ABHD16A	3	0
CH25H	2	1
C16orf74	1	1
MRPL24	3	1
MRPL21	1	1
MRPL20	2	0
MRPL23	1	1
MRPL22	1	2
GAB4	2	1
FAAH2	0	1
GAB2	2	2
MRPL28	2	0
GAB1	1	0
C2orf81	3	1
C2orf80	1	0
DMRTB1	1	0
ZSCAN9	3	2
LAG3	1	0
HABP2	4	3
C2orf88	1	0
NDRG2	1	0
NDRG3	1	0
NDRG4	3	1
ZSCAN2	7	1
SRSF5	2	1
SRSF4	1	0
SRSF6	3	1
CHD1L	4	1
SRSF2	1	0
MZB1	2	2
MAP3K7	2	1
RNF130	1	1
RAPH1	3	1
VIL1	6	0
RNF133	5	2
MSMB	1	0
HLA-DQB2	1	1
RNF138	1	1
RNF139	2	0
GID4	0	1
GPR137	0	2
CISD1	1	0
SUPT20H	4	0
TSHZ2	4	2
TSHZ3	5	1
TSHZ1	6	5
GID8	1	1
TRMT12	1	1
FOXS1	4	1
VILL	7	1
ZNF581	1	0
LPAR2	1	0
ZNF583	1	0
ZNF582	5	1
TIPARP	1	0
ZNF584	0	3
ZNF587	0	1
ZNF586	3	0
ZNF589	2	0
FAM212A	3	0
TMEM115	2	0
ASUN	4	0
KRTAP24-1	0	1
LPAR6	1	1
PSD	5	1
CAMKK2	1	1
CAMKK1	3	3
OR8U8	0	1
MYDGF	1	0
HOXA9	2	2
OR8U1	0	1
HAPLN2	1	1
MYO1H	4	2
MYO1G	8	1
MYO1F	3	2
MYO1E	5	1
MYO1D	5	1
MYO1C	8	3
MYO1B	6	1
MYO1A	8	2
GRN	4	2
LCN6	1	1
RAET1G	1	1
CHMP7	2	2
BCR	1	0
DENND6A	1	0
OR52N4	1	0
OR52N5	1	1
PGBD2	2	1
PGBD3	3	0
CTPS1	1	0
LGALSL	2	0
SULT6B1	2	0
LY6G6C	1	1
LY6G6D	2	1
SIAE	4	1
LY6G6F	1	0
HOXA10	3	0
KRTAP19-2	1	0
KRTAP19-3	2	0
KRTAP19-1	1	0
PPIAL4G	0	1
KRTAP19-5	1	0
KRTAP19-8	0	1
FAM160B2	9	3
ATAT1	1	0
GALNTL5	1	1
ZNF324	3	2
TSSK4	0	1
ZNF326	2	0
SRF	2	1
TSSK3	1	0
FAM214A	3	1
FAM214B	2	0
SRI	1	0
ZNF329	3	2
SRL	2	1
SRM	1	0
SRR	1	1
LGALS9	2	2
LGALS8	1	1
FAM220A	4	0
LGALS3	3	1
LGALS2	1	0
LGALS1	0	1
LGALS4	0	2
NMS	1	0
EIF2AK1	2	0
EIF2AK3	1	1
BCL2A1	2	0
TDG	2	0
EIF2AK4	3	1
EREG	1	1
MYO19	3	1
FAM136A	1	3
MYO16	5	2
TRNT1	2	1
ASAP1	0	1
ASAP2	3	1
ASAP3	4	2
ATG101	2	0
PLAUR	2	0
ENTPD5	1	0
HILPDA	1	0
LRRC27	3	1
SLCO1B3	3	6
TPPP	1	1
KIAA1522	3	1
SLCO1B7	4	3
KIAA1033	5	1
LOX	3	0
LPGAT1	1	0
LRRC29	0	1
LRRC28	2	1
GCNT4	1	2
GCNT1	2	1
GCNT3	3	1
GCNT2	3	2
OR14I1	3	0
OR5AC2	4	0
LPCAT4	1	2
LPCAT2	2	3
LPCAT3	1	1
LPCAT1	3	0
ALOX5	2	3
PIGC	1	2
PIGF	0	1
CALCRL	2	2
PIGK	1	1
PIGL	3	0
PIGM	1	0
PIGN	4	1
PIGO	7	2
PIGP	1	0
PIGQ	9	2
PIGR	6	3
PIGS	2	1
ILKAP	2	0
PIGU	5	1
PIGV	2	2
PIGX	2	0
PIGY	1	0
PIGZ	6	3
ENTPD8	1	0
TAGLN	3	0
TAX1BP1	3	1
DLEC1	12	6
OR10A7	2	0
ALPP	1	3
RHPN1	0	2
ELAC2	7	0
OLR1	1	0
RHPN2	4	2
CCDC170	5	1
CCDC171	8	2
SRRM3	0	1
CCDC173	1	2
SRRM5	1	2
CCDC175	5	3
FAM134B	2	0
PDK1	5	0
SUN2	6	2
PDK3	0	1
PDK4	2	0
LNPEP	3	1
ALPI	3	2
ZNF292	17	3
ALPL	2	2
PECR	1	2
TM2D3	1	0
GOLGA4	9	3
OGFRL1	2	0
PUF60	1	0
ZFAND4	4	1
ZFAND3	1	1
SUN5	4	1
PLVAP	3	1
CEP128	6	3
SLC39A10	1	5
SLC39A11	1	1
DEFB1	1	0
SLC39A14	1	0
CEP120	4	2
MIR1-1HG	4	0
NTRK1	3	0
NTRK2	2	0
NTRK3	1	0
EIF1AD	0	1
ARHGAP22	3	2
ARHGAP21	3	4
ARHGAP20	4	4
ARHGAP27	1	0
ARHGAP26	2	2
ARHGAP25	2	0
ARHGAP24	1	4
MTX3	1	1
ARHGAP29	5	2
ARHGAP28	1	1
OR9Q2	0	1
DDIT3	1	0
MICALCL	2	3
RBFA	1	2
COL19A1	7	1
PCGF2	1	0
MYSM1	2	0
ATG2A	11	1
ATG2B	12	2
BMP7	1	0
BMP6	2	1
GPR1	4	0
BMP4	1	1
BMP3	1	2
GPR6	2	1
BMP1	2	5
GPR4	0	1
MTURN	1	0
OR5R1	1	1
SWT1	1	1
TERF2	0	1
TERF1	3	0
FOXM1	8	0
2019-03-11	1	0
2019-03-10	3	2
RASSF1	1	0
PTOV1	5	0
PTPMT1	1	0
RASSF2	2	0
RASSF5	1	0
RASSF4	2	2
RASSF7	4	3
RASSF6	1	1
NHP2	2	0
RSAD2	2	0
RSAD1	1	0
CHD1	3	4
NFS1	2	0
CHD3	4	2
CHD2	4	0
CHD5	2	2
CHD4	1	0
CHD7	4	2
CHD6	6	6
CHD9	9	2
CHD8	4	3
CAP1	1	1
CAP2	1	1
NPC2	1	0
NPC1	8	1
SKIV2L	5	5
TTC5	1	0
TTC4	3	1
TTC1	0	1
IL4R	3	2
TTC3	7	3
PIKFYVE	5	4
PRKCE	2	0
C3orf52	1	1
TTC8	6	0
CAPS	3	1
DYNC1LI1	3	1
DYNC1LI2	1	1
CHDH	3	4
EFHC1	5	2
CAPG	2	0
TPRKB	2	0
ELP5	1	0
ETHE1	1	1
PRDM16	8	3
MPG	4	2
PLSCR4	2	1
PLSCR5	2	1
PLSCR2	1	1
PRDM13	5	1
PRDM10	2	0
PLSCR1	1	1
ABCG8	4	2
MPO	5	1
MPL	3	0
HNF4A	2	1
KRTAP5-3	1	0
MPI	3	2
HIST1H3A	0	1
SPC25	0	1
POLRMT	7	2
LMAN1	0	1
FUCA1	3	1
HIST1H3G	2	0
MCPH1	4	3
KDM1A	1	0
KDM1B	2	0
SLC36A4	1	0
OR1S1	3	0
OR1S2	3	2
NRDC	4	1
GADL1	4	0
KRTAP5-11	1	0
QRSL1	3	2
FCER1G	0	1
AKR1B10	2	1
FCER1A	3	0
AKR1B15	1	0
DNALI1	2	1
SLA2	1	0
C4orf36	1	0
METAP1	0	1
C4orf33	1	1
SRD5A3	2	0
SRD5A1	1	1
ARMT1	2	3
HELLS	3	1
FAM49A	1	0
ESRRB	1	1
FAM49B	1	0
PDILT	4	2
SLC6A20	2	0
ZFP36L2	0	1
SYNC	2	0
C10orf99	2	0
GGA3	5	2
GGA2	3	3
C10orf90	5	3
C10orf91	0	1
C15orf40	2	1
C15orf41	1	1
FHOD1	8	3
FHOD3	9	4
ADH7	2	1
ADH6	1	0
ADH5	1	1
ADH4	3	0
PKD2	5	0
PKD1	47	13
C4orf3	1	0
GJC1	2	0
ZNF138	3	0
FAM195B	3	0
PRKACG	2	1
PRKACA	0	1
NUAK2	2	1
PRKACB	1	0
STAMBPL1	3	1
ZNF131	4	0
PSMB5	1	0
PSMB4	3	0
PSMB3	1	0
PSMB2	1	0
ZNF136	1	4
FABP9	0	1
PFKFB2	0	1
LMBR1L	4	3
HDHD3	1	1
SPG7	5	4
DPPA5	1	0
PPARGC1B	5	1
TDGF1	1	1
RAPSN	1	2
RMI1	1	1
CORO6	0	1
MBL2	1	0
CIART	3	2
TCEB3B	5	5
KCNK4	1	0
KCNK5	2	2
KCNK6	1	1
TRAT1	3	0
MLH3	6	4
KCNK1	3	2
MLH1	7	0
KCNK3	1	0
EPS15	3	0
TRIML2	0	1
C9orf142	1	0
TRIML1	3	4
NACC2	0	2
ACOT11	1	2
ACOT12	2	2
ACOT13	4	0
VPS13A	13	2
VPS13C	6	5
VPS13B	15	2
BEX4	1	0
BEX2	1	0
CRYZ	2	0
SCAF11	12	4
NUP160	4	2
TMEM163	1	0
TMEM164	0	1
TMEM169	3	2
TMEM168	4	1
EVI2B	1	0
FOXN1	2	2
FOXN2	2	1
REPIN1	1	0
NICN1	2	2
XYLB	3	0
COL14A1	9	2
OR4X1	1	0
VWDE	9	4
GRIN2C	9	4
GNA14	3	1
GRIN2A	2	3
KLHDC8B	1	1
KLHDC8A	3	0
MYO10	13	2
NOL8	3	2
TAP1	2	0
IFFO2	1	0
PRKAR1B	2	2
MFGE8	3	0
C19orf18	1	1
IL6ST	2	2
SNAP91	2	0
SBF2	8	3
DBN1	1	2
OGDH	6	0
CDC73	1	0
R3HDM1	5	2
OLIG3	2	1
SEMG1	3	2
UPP1	1	1
SEMG2	4	1
EN2	1	0
LMBRD2	3	0
LMBRD1	6	0
DAZL	3	1
TAS2R19	1	1
SRFBP1	1	2
TAS2R16	3	0
TAS2R10	1	0
BCAT2	6	0
BCAT1	2	0
TAS2R13	2	1
DNAH17	27	14
TMEM9B	2	0
AAED1	1	2
MACROD2	5	1
MACROD1	3	0
FSD2	5	3
AKAP5	2	0
AKAP6	5	4
AKAP7	2	1
GTF2F1	6	0
AKAP1	6	0
AKAP3	4	1
CAGE1	3	1
EIF2D	2	1
AKAP8	5	0
AKAP9	17	5
EIF2A	3	0
ABI1	0	1
PPIP5K1	3	0
CYP26A1	2	0
CADPS2	10	0
PSTK	1	0
PHPT1	1	0
KLHL36	4	2
CCDC115	0	1
NFU1	1	0
TMEM170B	1	0
RRP1B	1	1
NOVA1	1	0
DNAH11	25	13
RAB7A	1	0
HSP90B1	1	0
CCDC113	3	0
TMEM99	0	1
KRR1	1	0
TMEM132E	2	2
SPATA17	1	2
TMEM132A	6	0
PEG10	3	1
TMEM132B	2	1
INTS1	14	6
OVGP1	3	0
STRN	2	1
DNAH12	2	2
CETN3	1	0
NAIF1	3	1
LTC4S	1	0
PCLO	18	9
DIO1	1	0
DIO2	2	1
VSX2	1	0
CCL20	1	0
CCL23	1	1
CCL25	1	0
CCL27	0	1
ALPK1	5	2
ALPK3	13	2
AGAP11	1	0
TRIOBP	10	6
C8orf48	2	4
UCK1	1	0
MGLL	2	0
UCK2	1	0
PHRF1	11	2
MAP3K8	1	0
TP53I3	0	1
CUX1	9	1
CUX2	7	2
TMEM94	5	3
BRF2	0	1
UBE2L6	2	0
BRF1	2	2
FSIP1	5	4
DNAJC8	0	1
DNAJC9	3	1
CAMSAP2	4	3
GLYATL3	2	0
DNAJC6	5	0
DNAJC7	2	0
DNAJC1	3	1
DNAJC3	3	0
SLC18A3	1	3
SLC18A2	2	0
SLC18A1	1	1
RALBP1	1	0
MAP3K6	7	1
PPP1R8	1	0
ZNF831	5	3
MTNR1B	2	0
ZNF835	1	0
MAP3K4	8	3
ZNF837	2	1
ZNF836	1	0
ZNF839	4	2
MAP3K5	5	0
IPO11	1	2
LRIF1	2	2
MTNR1A	0	2
PHAX	2	3
PRR29	2	1
ATOH7	1	0
ACAT1	1	0
ACAT2	0	1
ATOH1	1	0
RNF152	1	1
CD200R1	1	2
LIMD1	2	4
RNF151	3	0
NUGGC	2	3
ATOH8	4	0
IVD	3	1
PSG9	4	3
FMOD	4	0
CTF1	1	0
MECP2	2	2
TBPL1	0	1
SUGCT	1	2
ZNF578	2	1
LDLR	2	2
RARRES2	1	2
CPEB2	4	2
ZPBP	3	0
G3BP1	3	1
OR8S1	2	0
RBMXL1	2	0
ZFYVE21	2	1
ZFYVE27	2	0
TPCN1	4	2
TPCN2	5	2
RAB33B	0	1
SLC17A5	1	2
SLC17A6	1	1
ZFYVE28	3	2
SLC17A1	5	1
SPAG16	1	1
SPAG17	13	4
MDH1B	3	3
C16orf58	2	2
RBMXL2	0	1
SETDB2	3	0
MRAP2	1	1
CDK5RAP2	6	2
CMTR2	8	1
CMTR1	2	1
TRPV2	4	1
C16orf54	1	0
PDDC1	0	2
TMEM175	6	2
KIAA0319L	1	1
ITCH	2	1
FMO3	4	0
ERC1	4	2
ERC2	7	0
CHMP4C	2	1
BAX	1	0
CTSK	2	0
BHMT2	3	0
PRKCDBP	1	0
COBLL1	6	2
SLC37A2	5	2
SLC37A3	3	0
CDK18	5	0
SLC37A1	1	2
GFI1B	2	2
PMPCB	6	3
PMPCA	4	1
CDK12	2	1
CDK13	4	3
CDK10	2	0
FMO5	2	1
CDK17	2	0
SULF1	4	3
CDK15	4	2
ST5	6	2
ST7	1	0
GZF1	2	3
ATP6V1B1	5	1
ATP6V1B2	2	0
AASDH	4	2
PIP5KL1	1	1
CTSD	0	1
ZNF304	2	1
BFSP2	4	1
ZNF302	5	1
FBXO16	1	0
ZNF300	2	0
FAM216B	1	0
FAM216A	2	0
CTSF	1	0
STS	0	2
P2RY2	4	1
MMP24	2	1
MMP27	4	1
MMP26	2	2
MMP21	4	2
MMP20	3	2
P2RY4	1	0
TFG	0	2
RND1	2	0
RND2	1	1
RND3	1	0
NCL	2	1
CTNNBIP1	4	0
HDAC11	3	0
PPP3CB	1	0
PPP3CC	3	1
TCAIM	3	0
KIAA1549	10	4
LRRC41	2	3
LRRC40	4	1
LRRC43	3	3
LRRC42	3	2
LRRC45	4	2
LRRC47	4	1
LRRC46	2	0
LRRC49	1	2
FGFR4	2	1
B3GNT4	2	1
B3GNT5	1	0
BORA	1	1
FNDC8	1	0
FNDC9	0	1
B3GNT3	3	0
TSFM	1	0
GPATCH2	0	2
FNDC7	3	2
B3GNT8	3	2
FNDC1	9	8
ADRA2B	1	1
FGFR3	5	3
TEX26	3	1
PWWP2B	1	3
PWWP2A	2	1
FGFR1	0	1
GINM1	1	0
TBCCD1	1	1
DAAM1	4	0
DAAM2	5	2
HLA-DRB1	1	0
PSRC1	3	0
HLA-DRB5	1	0
CCDC152	1	1
CCDC153	2	0
CCDC150	2	1
CCDC151	1	0
GUK1	1	0
CCDC157	5	3
CCDC154	5	1
YIF1A	3	0
CCDC158	4	1
CCDC159	2	0
WRAP73	3	0
TUFT1	1	0
TMCO5A	1	1
SYT8	3	0
SYT9	0	2
LRRC4C	4	2
MTCH1	1	0
ACR	0	1
OR6T1	1	1
SYT4	1	1
SYT5	6	1
SYT6	8	0
SYT7	0	1
SYK	0	1
RHO	1	1
ATP5O	2	1
RHD	0	2
MEP1B	3	2
PCED1A	4	1
PCED1B	0	4
FUBP3	0	2
FUBP1	2	0
NCSTN	2	0
SCHIP1	0	2
SPZ1	1	0
CEP104	3	2
FAM189A2	1	1
FAM189A1	4	1
COG7	3	2
MARCO	3	1
GNAI2	1	0
TCP11L2	1	2
NES	12	3
CNTROB	7	2
PALMD	3	0
ANGPT2	3	0
ANGPT1	2	0
DRC3	6	1
DRC1	3	2
PALM3	3	1
PALM2	1	3
OXT	1	0
C1orf53	1	0
C1orf52	2	0
OR5T3	2	1
OR5T2	4	2
C1orf56	1	0
C1orf54	1	0
MARC1	0	1
MARC2	2	1
ICMT	1	0
FDCSP	1	0
RGP1	4	2
FCF1	1	0
ATP6V0A4	3	4
ATP6V0A1	6	2
ATP6V0A2	3	3
GUCA1A	1	1
GUCA1C	0	2
GUCA1B	0	1
KRT75	1	2
KRT74	3	1
KRT77	1	2
KRT76	3	2
KRT71	4	2
KRT73	3	2
KRT72	3	2
GPR148	3	2
ATM	14	6
KRT79	3	2
KRT78	3	1
TBC1D5	4	1
SMPD4	3	0
ATR	4	5
HAAO	4	0
ACOXL	5	0
SMPD2	1	2
BRIP1	5	2
PDE11A	2	1
DNAJC5B	2	0
ITGBL1	2	1
ATP5A1	2	2
HFE2	1	0
TTC28	13	3
TTC29	3	0
TTC24	4	0
TTC26	4	0
TTC27	3	1
PATL2	5	1
PATL1	3	4
ETFA	1	0
CARS	6	0
PODXL2	3	0
U2SURP	1	0
IL6R	0	2
ENO1	1	0
ENO2	0	1
ENO3	1	1
PDE7A	1	2
CARF	5	2
TAOK1	1	0
TAOK2	1	2
SYCP1	5	1
MCEMP1	1	1
CNOT6L	0	1
FAXC	4	2
SLC22A18	2	1
LLGL1	5	2
ACOX2	2	2
ACOX3	5	0
SLC22A14	3	0
ACOX1	2	1
SLC22A12	0	3
SLC22A13	1	0
SLC22A10	4	0
SLC22A11	3	1
NSMCE1	1	1
NSMCE2	1	0
NSMCE3	2	0
THEMIS	4	2
CFD	3	0
OBSCN	52	25
DAGLA	2	2
PTK2	0	2
PTK7	0	1
PTK6	6	1
RABGAP1	3	2
PRKAA2	2	2
SERGEF	1	2
RCSD1	2	1
MCL1	1	1
SORBS1	4	3
SORBS3	2	3
SORBS2	5	2
ODC1	3	2
SCARA3	1	3
IL18RAP	3	4
SCARA5	3	2
ATG16L1	1	1
ATG16L2	2	0
NIPAL3	1	1
EOMES	2	0
C4orf51	0	1
DNAJC5G	1	1
C3orf30	1	2
ARHGDIB	0	1
C3orf36	2	0
C3orf35	1	1
ARHGDIA	2	1
USH1C	4	3
NANS	0	1
C3orf38	3	0
USH1G	4	1
IL17REL	1	1
MATN1	2	2
MATN3	2	1
MATN2	7	8
MATN4	1	3
TANC1	8	3
TANC2	5	4
C15orf62	0	1
CES3	2	2
C15orf61	1	0
EBF3	2	0
KBTBD12	3	1
KBTBD11	1	0
FFAR2	5	0
LMNA	3	1
UCP3	4	1
BDH2	1	1
ENDOV	1	1
MDP1	1	1
BDH1	2	1
DDX23	0	3
DDX21	2	1
DDX20	4	1
DDX27	5	2
ZNF157	2	1
DDX25	1	0
DDX24	8	1
GULP1	0	1
IGDCC4	6	2
DDX28	3	1
ZNF90	2	0
ZNF91	6	0
ZNF92	0	1
ZNF93	2	0
ZNF98	1	0
ZNF99	4	0
SAC3D1	2	0
FLVCR1	2	0
FKBP15	5	2
RAET1E	1	0
UBE2J1	1	0
FKBP10	4	2
RAB3IP	1	0
TBX21	0	1
TBX20	2	0
FBXO10	1	1
FBXO11	2	1
FAM3D	1	0
FBXO17	0	2
FBXO15	5	1
PDPN	1	0
SFTA3	1	1
NACA2	1	2
PROX1	1	0
CNGB1	12	0
C9orf163	2	0
FAM153B	1	0
PARD6B	4	0
PLA2G6	4	2
PLA2G7	6	0
MARCKS	1	0
PLA2G3	4	2
GDPGP1	1	0
SHC4	4	1
CCDC77	1	1
ATPAF1	1	1
SHC1	1	0
ERBB4	8	2
CCDC71	3	0
OR2G3	1	1
OR2G2	4	0
FPR2	1	1
FPR3	1	0
OR2G6	1	0
CCDC78	1	0
CGRRF1	1	1
TMEM109	2	0
TMEM108	6	3
HIST3H2BB	0	1
MPHOSPH8	4	1
TMEM102	1	1
TMEM101	1	1
FOXH1	0	1
TMEM107	1	0
TMEM105	2	0
TMEM104	4	3
SMPDL3B	2	0
GHITM	1	0
TRANK1	9	6
LOC650293	3	0
FAM90A1	0	2
CSHL1	3	1
SPEN	13	4
ZCWPW2	1	1
ZCWPW1	3	4
SPEG	8	2
MANEAL	1	0
SSC4D	1	0
PAIP2	1	0
CGN	11	3
PAIP1	1	0
SLC15A3	3	0
AIM1L	4	2
FBLIM1	1	3
DAXX	0	2
CDC16	3	0
MET	3	2
AHNAK	34	17
TBATA	4	1
NT5E	1	3
MAP10	7	3
LGALS9C	0	1
LGALS9B	1	0
NKAIN4	2	1
NKAIN1	2	0
MAP1A	13	3
MAP1B	6	4
PDCL2	2	0
PDCL3	1	0
LBX2	3	2
UNC5C	11	1
VGF	1	1
UNC5A	1	1
UNC5D	5	0
CCM2	3	1
MAP1S	5	4
FRMD8	2	1
CCP110	5	2
SPICE1	3	2
FRMD6	4	0
FRMD7	0	1
FRMD1	7	1
FRMD3	2	5
UBA7	7	1
MED13L	6	3
PTCD2	2	0
PTCD3	2	4
DSCR3	1	0
PTCD1	3	3
CSPG4	14	6
GNAL	0	1
HLTF	6	3
AGFG2	1	2
AGFG1	1	0
DPF3	1	0
DPF1	2	2
CLPX	2	0
CRYGS	1	0
KRT3	5	3
KRT2	2	1
KRT1	1	0
FST	0	1
CRYGN	1	0
PWP2	8	3
CRYGA	1	0
CEND1	2	0
CRYGC	1	1
CRYGD	1	0
DACT2	8	0
BORCS7	2	0
VPS45	5	0
BORCS5	1	0
RRNAD1	3	1
VPS41	1	2
BCAP29	3	0
TMCC1	1	0
TMCC2	5	1
ECT2L	3	2
SDR42E1	4	1
TAS2R30	3	2
TAS2R31	1	1
NMNAT3	2	0
NMNAT1	2	0
ALOX12B	3	1
TAS2R38	3	0
TAS2R39	4	2
EPB41L1	1	0
NAA16	2	2
EPB41L3	7	2
EPB41L2	5	2
EPB41L5	1	2
ACSS3	3	0
ACSS2	4	1
ACSS1	0	1
KIDINS220	8	3
PLEKHM1	3	3
PLEKHM2	4	0
PLEKHM3	4	0
VPS4A	3	2
VPS4B	3	0
ZNF727	7	0
GMEB2	1	1
GMEB1	1	1
SLC43A3	2	0
FAM72B	1	0
SLC43A1	2	0
OR5C1	6	2
CNTNAP1	6	2
GSTM3	2	0
DFNA5	3	1
NAA10	0	1
RRP36	3	0
DCAF12	1	0
WNT3	0	3
WNT2	2	0
WNT1	2	0
NAA11	1	0
AGXT	1	1
LRRN2	5	0
WNT4	1	0
TREML2	1	1
TREML1	2	0
GPAA1	2	1
TREML4	3	0
ST8SIA6	2	2
DCAF17	2	0
PALB2	4	3
RIPK4	7	2
RECK	3	3
INSC	3	2
TYRP1	1	1
SPDYE5	2	0
GPRIN3	9	4
GPRIN1	3	0
SPDYE1	3	0
CRISPLD1	3	1
SPDYE3	4	0
CDHR5	2	2
KAT2B	5	0
INSR	3	1
RUNX1T1	2	0
HIST2H2BF	1	0
ZNF813	2	1
SPTBN5	22	9
SPTBN4	8	5
SPTBN2	15	4
SPTBN1	6	1
ZNF814	4	1
KLF13	0	3
KLF12	1	0
KLF11	10	2
KLF10	3	1
KLF17	1	0
KLF15	2	0
TFAP2A	2	0
SLC9B1	4	1
TFAP2C	1	1
TFAP2B	0	1
TFAP2E	5	1
TFAP2D	1	0
MCCD1	1	0
GBE1	3	5
OR51T1	2	2
FGGY	1	1
PCNA	1	0
SLC44A1	3	1
SLC44A2	1	0
SLC44A3	2	1
SLC44A4	4	2
SLC44A5	5	1
ZBTB7C	4	2
ZBTB7B	3	0
MSI2	0	1
PCNP	2	0
PCNT	21	6
PCNX	6	8
MRPL39	1	1
SLU7	2	1
ENGASE	6	3
PACRG	3	0
FEZF2	1	0
FAM69B	5	0
UBE2U	1	0
RPA1	2	1
FAM69A	3	1
C1D	1	1
NDUFS1	3	2
NDUFS2	2	1
NDUFS3	1	0
NDUFS4	3	0
NDUFS5	1	1
NDUFS6	1	0
SLC9A3R2	5	3
NDUFS8	1	0
COQ4	1	0
COQ7	3	0
COQ6	2	1
SLC9A3R1	3	3
COQ3	2	0
ILF2	0	1
FAM198A	2	0
FAM198B	5	0
ZRANB1	1	1
DMRTC2	0	1
ZRANB3	4	2
ZRANB2	1	0
PLCXD3	4	0
FAM132A	3	0
HBB	1	0
CHMP2B	0	2
PCDHGB2	2	1
PCDHGB1	4	3
BOK	3	1
PCDHGB7	6	2
PCDHGB6	4	4
PCDHGB5	5	3
PCDHGB4	6	0
BOC	5	2
RREB1	17	4
DENND2C	7	3
TPX2	3	3
DENND2A	6	3
DENND2D	2	2
WWC3	0	3
WWC2	5	0
WWC1	7	3
INPP4B	6	0
INPP4A	6	1
MICAL1	5	7
MICAL2	10	0
TP53AIP1	1	0
PHC1	0	2
PHC3	4	1
PHC2	3	1
GPR108	4	1
MFAP3L	0	2
SMDT1	1	0
BRICD5	3	0
PIANP	2	1
ZNF362	1	0
ZNF365	3	2
GRXCR1	0	1
GRXCR2	4	0
ZNF366	6	1
PRF1	3	2
RPS6	1	0
MGMT	1	2
ABCA9	6	1
ZNF415	1	1
ALS2CR11	1	0
AP1G2	6	1
H2AFY	2	0
RNF8	1	0
RNF6	4	0
RNF4	1	0
ZNF410	1	2
AVPR2	1	1
H2AFJ	2	0
PRSS1	1	0
NCAPG2	0	2
RHBDL2	2	2
RFX1	3	4
SRGN	1	0
LRRC69	3	1
PPP1R21	5	0
CLTC	2	1
CLTB	2	0
TMEM59L	1	1
GLIPR2	1	0
LRRC61	1	1
NGLY1	3	0
LRRC66	3	3
FLG	50	16
DPEP3	4	0
IPMK	4	0
C7orf34	2	0
NMD3	3	2
C7orf31	4	3
BTBD11	4	0
GLIPR1	1	1
ZNF605	2	0
SPATA31C2	2	0
SLC17A8	3	1
MSANTD3-TMEFF1	1	2
PCOLCE	1	2
EPM2A	2	0
ISCA1	3	1
HSD3B2	3	0
FAM118A	2	1
FAM118B	2	0
LMX1A	1	0
LMX1B	1	1
OR6V1	1	1
MISP	8	3
CD300A	0	1
POU4F1	1	0
IL23R	4	0
SIK2	2	1
GGT1	3	0
PRKRIR	3	0
ACTR8	2	4
BAIAP3	10	3
ACTR6	1	0
ACTR5	2	0
XPNPEP3	3	1
ACTR2	1	0
NUP88	1	0
WBSCR27	5	0
VAX2	5	2
WBSCR22	2	0
RECQL4	9	9
MTG2	5	2
FBF1	7	3
WBSCR28	2	0
FOXP1	1	2
GNRHR	2	1
PDE3B	3	2
SPINK13	1	0
ADNP	4	4
CNR1	2	0
GBX2	1	0
NPR3	1	0
CNR2	3	0
IL10RB	1	1
POLDIP3	4	1
C1GALT1C1L	1	3
GP1BA	5	3
RAPGEFL1	3	1
GTDC1	5	1
ALDH18A1	3	3
PXK	8	0
ICOS	1	0
HHEX	3	0
CCDC144NL	6	1
OTULIN	1	0
ACTN1	3	0
ADGRF3	5	0
NUP85	2	3
TGS1	7	4
ANKS1B	4	1
ABI3BP	4	0
ANKS1A	2	5
OR5V1	1	1
PTPRR	2	1
PPOX	1	3
SPERT	1	2
ACTRT1	2	0
ACTRT2	2	0
ACTRT3	3	1
TINF2	1	0
PITPNM1	6	4
NKX3-2	1	0
NKX3-1	1	0
GNRH1	1	0
ZIM3	1	0
GPATCH8	7	2
GLYATL2	0	1
VHLL	2	1
MDGA1	6	3
GTSF1	2	0
ADAM10	2	0
ADAM11	2	0
ADAM12	4	2
ADAM15	6	4
ADAM17	1	2
ADAM18	3	4
ADAM19	2	2
CPNE8	1	0
TYW1	5	0
CPNE3	3	2
CPNE2	3	0
CPNE1	2	2
CPNE7	5	1
CPNE6	1	1
CPNE5	1	1
CPNE4	1	0
WNT8A	3	0
WNT8B	1	0
PYCARD	0	1
DNMT3B	3	1
OPALIN	1	0
DNMT3A	1	1
DNMT3L	1	0
AAK1	4	0
PVRIG	2	3
SNRPB	1	0
OR2W1	1	0
SNRPA	2	0
SHANK3	4	2
SHANK2	0	3
SHANK1	4	5
KLC4	2	5
ZNF556	3	2
SALL4	4	3
DTWD2	1	0
TECR	1	0
RGS9BP	0	1
PLAC8L1	3	0
CDC42BPB	8	3
FLT3LG	3	1
PTPRH	12	3
ZDHHC14	2	1
ZDHHC17	3	0
PCSK9	2	0
ZDHHC11	5	1
ZDHHC13	2	1
ZDHHC12	2	1
PRKAG1	1	1
PRKAG3	3	1
PCSK1	2	1
ZDHHC19	5	3
ZDHHC18	1	1
PCSK4	7	2
PCSK5	3	1
HIPK3	1	2
HIPK2	4	1
HIPK1	0	1
IFT27	0	2
HIPK4	3	0
DUSP23	1	0
LEMD3	4	1
DUSP26	0	1
DUSP27	10	5
QARS	6	0
NCAN	9	7
EXOC1	3	0
NAPG	0	1
ESPL1	7	4
C3orf18	3	0
NAPA	5	0
C3orf14	1	0
C3orf17	0	2
YAF2	0	1
LARP1	3	1
LARP4	3	3
ISM2	2	3
ISM1	2	0
EXOC6	3	0
TPTE	1	1
DDX49	2	1
COL15A1	8	2
ODAM	1	0
DDX41	3	3
TMEM45A	2	1
EDIL3	2	2
ZNF177	3	1
PTER	3	0
DDX47	3	2
LMLN	5	1
ZGPAT	5	2
PLTP	2	3
ATMIN	3	0
NLN	3	1
LGR5	4	1
LGR4	3	2
LGR6	13	1
ELAVL1	2	0
ELAVL2	0	1
ELAVL3	2	0
CDKN1C	1	0
CDKN1B	2	0
CDKN1A	1	1
C11orf1	1	0
DPYSL5	3	0
SETBP1	5	1
SAMSN1	1	1
FERD3L	1	0
SAP130	2	1
DNAI1	5	1
APOD	3	0
DNAI2	5	3
APOB	24	9
APOO	1	0
APOM	1	0
APOH	0	1
UTP11L	2	0
FAM151A	3	0
FAM104A	1	1
FAM104B	1	1
NFIL3	2	0
REG3G	0	1
TMEM125	1	1
CCDC51	2	0
TMEM127	1	0
FOXJ3	3	0
FRAS1	27	6
CCDC57	7	2
CCDC59	0	1
KIF18B	4	1
TMEM129	1	1
PAXIP1	2	2
STX18	0	2
NUFIP2	1	1
VPRBP	1	1
PREPL	6	2
CABP7	1	1
CABP4	2	1
CABP2	3	0
CABP1	3	0
FBXO34	3	5
SLC35B3	2	2
SLC35B2	4	0
FBXO30	4	0
SLC35B4	3	1
FBXO32	1	1
FBXO33	3	1
IGFBP6	1	2
FBXO38	6	0
FBXO39	1	1
GNS	0	2
PELP1	4	3
MBOAT1	1	0
MBOAT7	3	1
PHF21A	1	0
MBOAT4	1	2
SPSB3	2	1
SPSB2	1	0
SPSB1	1	0
APBB3	5	0
HINT1	1	0
SLC25A52	1	1
SDPR	4	1
BPGM	1	0
UNC79	10	8
DTX3	0	1
CDC37	2	0
ALAS1	2	1
ALAS2	1	1
OR2A2	1	0
OR2A5	3	1
OR2A7	1	0
S100A5	1	0
S100A4	0	1
PTTG2	4	1
S100A6	1	0
S100A1	2	0
[truncated: 13,219 more rows]

## Sheet: syn_case_control_count
Gene	Case	Control
UBE2Q1	2	0
DUOXA1	1	0
RNF17	3	3
RNF10	5	0
RNF13	0	1
REM1	2	0
REM2	1	0
RPEL1	1	0
UBE2Q2	0	1
CHMP1B	1	0
PMM2	0	1
PMM1	1	0
ASS1	0	1
FHIT	2	0
ZNF709	2	0
ZNF879	1	1
DISC1	1	0
CAMK1	2	0
ZNF701	0	1
ZNF700	1	0
ZNF707	1	0
CAMK4	2	0
ZC3H10	1	0
ZC3H13	3	0
ZC3H15	1	0
ZC3H14	3	2
SPN	0	1
RNF111	4	0
ZC3H18	1	0
GRIN1	4	0
SP8	3	1
SP9	2	1
TCOF1	3	3
NSRP1	0	1
NUP98	5	1
XPC	5	2
SP1	3	0
GRINA	2	0
SP3	3	1
SP4	2	2
CAMKV	1	0
GOLIM4	1	2
OPA1	1	0
RAB40C	2	2
RAB40A	1	0
COL7A1	6	4
CLRN1	1	0
GTSE1	3	2
OVCH2	2	0
OVCH1	0	2
SPPL2C	2	2
NSL1	1	0
ITGA9	3	2
UGCG	1	0
MYO3B	0	1
ATP2A1	2	1
ATP2A2	1	0
ATP2A3	3	2
ITGA1	6	2
ITGA2	3	1
NOP2	2	1
ITGA4	4	0
ITGA5	1	3
ITGA6	4	1
ITGA7	2	3
TRHR	1	0
DENND4A	2	3
DENND4B	1	3
DENND4C	4	0
SWAP70	1	0
PREB	3	0
UFSP1	1	1
GAP43	2	2
PAMR1	4	2
FBXL13	2	0
HRH2	2	0
FBXL14	3	1
FBXL17	5	1
HRH1	1	1
FAM169A	1	1
FBXL18	3	1
GHDC	1	2
SDK1	12	2
SDK2	11	2
TPRN	0	1
THSD4	2	1
FAM212B	1	0
THSD1	4	1
CHST9	1	0
CHST8	1	2
COL4A5	1	1
COL4A4	4	0
COL4A3	4	2
COL4A2	4	3
COL4A1	8	2
OR8J3	1	0
CHST1	2	1
CHST3	0	2
CHST2	0	2
CHST5	0	1
CHST4	1	0
CHST7	1	2
ITGAX	6	3
MLNR	1	0
HLX	2	1
HLCS	2	1
ITGAV	2	0
PREP	2	0
ZNF703	4	0
ITGAL	3	2
ITGAM	1	2
ITGAD	4	3
FAM134B	2	0
FAM134A	1	0
SMAD9	1	1
TRERF1	7	3
LRPAP1	1	1
SMAD7	2	0
SMAD1	1	0
AFTPH	5	2
MUS81	1	1
AMMECR1L	1	0
TMPRSS11A	1	0
TMPRSS11B	1	0
IGF2R	6	3
TMPRSS11F	2	0
RAD21L1	1	0
NECAP2	1	0
SLC36A3	2	0
SLC36A2	4	1
SLC36A1	3	4
ERICH6	1	0
ERICH5	1	0
ERICH3	1	1
ERICH1	1	1
ART4	1	0
SPTLC1	2	0
TCEA2	0	1
COX4I2	1	0
BFAR	0	2
CRTAM	2	0
OR6P1	3	1
CCDC116	2	0
CADPS2	2	1
CCDC114	3	0
RLF	6	3
CCDC112	1	0
MCF2L	5	1
CCDC110	4	0
LEO1	1	1
MTCL1	9	5
ATP1A4	2	1
ATP1A3	3	2
ATP1A2	2	0
ATP1A1	7	1
MGRN1	4	2
SPHK2	6	1
SPHK1	1	1
DPT	2	1
CUEDC1	2	0
CUEDC2	2	0
IPO13	3	0
CPEB1	0	1
CPEB3	0	1
CPEB2	2	0
BEGAIN	3	1
RBMXL3	5	1
SRBD1	2	1
ABAT	1	3
CDH20	1	1
ZNF780A	2	1
ZNF780B	1	0
TP53TG5	1	0
C2CD5	3	0
IFT80	3	1
IFT81	1	1
IFT88	3	3
POU5F1B	2	0
SP2	1	3
MCM10	3	1
NUP93	1	0
IGFBPL1	1	0
ATG4C	1	0
ATG4B	1	0
C12orf10	2	2
ATG4D	0	1
PHOX2B	1	1
CATSPER2	2	1
LRGUK	4	1
UPK2	0	1
CFH	6	3
GPT2	1	0
CFD	1	0
CFB	1	2
OR5P3	1	0
OR5P2	1	1
LHPP	2	0
HKR1	3	2
CDKAL1	2	0
PNN	1	1
ATP6V0E2	2	0
CFP	1	0
SERPINA12	3	1
AAAS	2	0
SIDT1	6	2
SIDT2	2	3
SIX4	3	0
SIX5	2	2
SAGE1	2	1
MR1	1	0
SIX3	0	1
NAALAD2	1	0
CNPY1	1	0
NODAL	1	0
SYNJ1	1	0
KNDC1	8	2
HMG20B	3	1
C3orf79	1	0
C4orf17	1	0
SHOX2	1	0
ZFP82	2	1
CHFR	2	4
GPR75	1	1
SYPL2	1	0
RFX8	2	1
RCOR2	0	1
RFX4	2	1
RFX5	1	0
RFX6	3	2
RFX7	2	2
NRXN3	1	1
NRXN2	5	0
NRXN1	6	2
RFX3	2	1
YDJC	2	0
IBA57	0	1
APC	6	2
ABCE1	0	1
UQCRC2	0	1
XPNPEP1	4	0
XPNPEP2	1	1
UQCRC1	0	2
GGCX	2	2
PAPLN	6	1
RETSAT	0	2
ZNF57	3	1
KHDRBS1	1	1
KHDRBS3	1	0
KHDRBS2	1	0
LHCGR	1	0
INF2	4	1
DPYSL4	3	0
TARS2	3	0
DPYSL2	3	0
DPYSL3	1	1
OR4D9	1	1
KRTAP10-12	3	0
KRTAP10-11	1	0
KRTAP10-10	2	0
IGFBP2	1	1
IGFBP3	1	0
IGFBP6	1	0
IGFBP4	2	0
IGFBP5	3	1
CYP1B1	2	0
GJA1	1	0
GJA3	0	1
APLNR	1	1
GJA5	1	0
GJA8	2	0
GJA9	1	0
OR4D1	1	0
KDM3B	6	2
KDM3A	2	1
ZNF112	2	0
SEZ6L	3	2
PPP6R3	1	0
TMC4	2	2
ITGA8	3	1
TMC6	3	1
TMC7	1	1
TMC1	2	2
TMC2	5	0
TMC3	2	1
EIF2B2	0	2
EIF2B3	1	0
EIF2B1	1	1
PRKAR2A	0	2
PRKAR2B	1	1
OR4D6	0	1
TXNIP	1	0
QPRT	1	1
IFT140	4	1
HIST1H4B	2	0
TMEM14B	1	0
MECOM	5	3
ITGA2B	2	1
RSPH1	1	0
IFI16	1	0
PNISR	0	2
MYT1L	7	0
CFHR2	0	1
PHACTR4	1	0
CLIC5	0	1
PHACTR1	1	0
OR2K2	0	1
CFHR4	0	2
NLGN1	1	1
KRTAP2-1	0	1
TMEM147	1	0
ASGR1	1	0
ASGR2	1	0
TMEM143	0	1
TMEM141	1	0
TMEM140	5	0
API5	1	1
PRDM8	2	0
RTKN2	2	1
P2RX7	3	0
SOWAHA	2	2
SOWAHB	0	2
SOWAHD	1	0
HLA-DPA1	1	0
FAM32A	1	1
KIAA1191	0	1
FER1L6	3	3
VMP1	1	0
FER1L5	5	2
ZMAT1	0	1
ZMAT5	1	0
C19orf25	0	1
MYBL1	1	1
SMOC2	2	0
NR1D2	1	1
MYBL2	1	1
MUC20	0	2
ZNF7	1	1
ZNF2	3	1
ZNF3	1	0
CTCFL	1	0
PHLDA1	3	0
ZNF8	2	2
C11orf16	0	1
ZAP70	4	1
TXNRD3NB	1	0
OGFR	3	0
RAC3	1	0
RAC1	2	1
VCL	3	1
MRPS18A	2	0
VCP	3	0
CPLX1	1	1
AP2A1	3	0
AP2A2	2	1
VCX	0	1
NIM1K	0	2
CADPS	2	2
PBX2	2	1
PBX3	1	0
AIRE	2	2
NSUN3	1	0
NSUN2	4	0
NSUN5	1	2
NSUN4	0	2
NSUN7	1	1
NSUN6	0	1
PRAMEF4	1	1
TUBG2	0	2
FAM71F1	0	1
PRAMEF1	1	0
PRAMEF2	1	0
PTCH2	2	2
PTCH1	3	2
TIMM44	0	3
KMT5B	2	1
KMT5C	6	0
RAD9A	2	0
KMT5A	1	0
ERGIC2	0	1
ERGIC3	3	0
CDR2L	1	1
ERGIC1	1	0
CLEC14A	2	1
CLU	3	0
B3GAT3	2	0
B3GAT1	1	1
CALM2	0	1
TTC30A	2	0
TTC30B	3	2
SPG20	2	0
GSDMA	1	0
GSDMB	1	0
GSDMC	0	1
GSDMD	3	2
HRH4	0	1
DLGAP2	7	3
DLGAP3	3	2
DLGAP1	5	0
DLGAP4	5	1
DLGAP5	2	0
BRDT	0	1
MBNL1	1	2
MBNL2	1	0
NPEPL1	3	2
HRH3	1	0
CLCN2	2	1
CLCN1	1	0
FBXL16	1	1
CLCN7	2	0
CLCN6	4	3
CLCN5	1	0
CLCN4	1	0
BRD8	2	1
BRD9	2	0
BRD4	2	2
BRD7	2	0
BRD1	11	0
BRD3	0	1
DNAJA3	1	1
PTPN18	2	0
DNAJA4	2	0
PTPN13	5	0
PTPN12	3	0
PTPN11	0	1
NKX2-8	0	2
PTPN14	3	2
MAGEL2	5	0
UTRN	5	2
ABHD16A	4	0
CSF2RB	3	1
MRPL24	1	0
MRPL21	1	0
MRPL20	0	1
SEH1L	1	0
MRPL22	0	1
GAB4	3	1
GAB2	6	1
OR4L1	1	0
GAB1	1	0
C2orf80	1	0
C2orf82	2	0
HABP2	2	0
NDRG1	2	1
NDRG2	2	0
NDRG3	0	2
NDRG4	3	1
ZSCAN2	5	1
SRSF5	0	1
SRSF4	1	0
SRSF7	0	1
SRSF6	1	0
CHD1L	3	0
SRSF2	1	0
MZB1	1	0
RNF130	5	1
RAPH1	4	3
VIL1	1	0
HLA-DQB2	1	0
RNF138	1	0
RNF139	3	1
SNTG2	1	0
CISD2	1	0
SUPT20H	1	2
TSHZ2	6	3
TSHZ3	9	5
TSHZ1	4	0
GID8	1	0
CHML	2	0
FOXS1	1	0
VILL	5	0
ZNF581	0	1
IGLL1	3	0
ZNF583	0	2
TIPARP	4	0
ZNF584	2	0
ZNF587	1	0
LPAR3	1	0
FAM212A	1	0
TMEM115	2	0
ASUN	1	0
KRTAP24-1	1	0
PSD	6	2
CAMKK2	5	2
CAMKK1	2	1
NPTXR	0	1
HAPLN2	1	0
MTRF1L	0	1
MYO1H	2	0
MYO1G	1	1
MYO1F	4	2
MYO1E	3	1
MYO1D	3	4
MYO1C	7	2
MYO1A	2	2
GRN	3	1
AMOTL2	3	1
RPL36AL	1	0
KIAA0391	1	2
CHMP7	1	0
CHMP6	1	0
BCR	7	1
OR52N4	1	0
PGBD5	2	0
PGBD2	1	1
PGBD3	1	1
CTPS1	1	0
PGBD1	1	0
SULT6B1	1	0
LY6G6D	1	0
HOXA11	1	0
HOXA10	1	0
KRTAP19-7	1	0
KRTAP19-5	1	0
FAM160B1	3	1
FAM160B2	1	2
ATAT1	1	1
TSSK6	0	1
ZNF324	3	5
TSSK4	0	1
GALNTL6	1	0
SRF	1	0
TSSK3	1	1
FAM214A	1	1
FAM214B	1	1
SRI	0	1
ZNF329	0	2
SRL	3	0
SRM	1	0
LGALS8	1	0
FAM220A	0	1
LGALS3	1	2
LGALS1	3	0
AKIRIN2	2	0
AKIRIN1	1	0
EIF2AK1	0	1
EIF2AK3	2	1
BCL2A1	3	0
TDG	1	0
EIF2AK4	1	1
HN1	1	0
NMB	1	0
MYO19	4	1
MYO16	9	4
ASAP1	3	1
ASAP2	5	0
NMI	1	0
OCRL	1	0
ATG101	1	0
PLAUR	1	0
ENTPD5	3	3
LRRC27	1	0
LRRC26	1	0
SLCO1B3	3	0
TPPP	1	0
LRRC23	0	1
SLCO1B7	1	0
KIAA1033	1	0
LOX	3	2
LRRC28	0	1
GCNT4	2	0
NXN	0	1
GCNT1	2	0
GCNT3	2	2
GCNT2	2	0
C14orf132	1	0
LPCAT4	2	0
LPCAT3	0	2
LPCAT1	3	2
ALOX5	3	1
PIGH	0	1
PIGK	2	1
PIGL	1	0
PIGM	2	0
PIGN	1	1
PIGO	1	1
PIGQ	2	0
PIGR	4	2
PIGS	1	1
PIGT	1	0
PIGU	3	0
PIGV	1	0
PIGW	1	0
PIGZ	4	0
ENTPD8	4	0
TAGLN	0	1
TAX1BP1	2	0
CSNK1G2	1	0
OR10A7	2	1
ANKLE2	6	2
RHPN1	4	1
INPPL1	1	2
RHPN2	2	0
SRRM1	2	1
CCDC171	4	2
SRRM2	13	4
SRRM5	1	0
CCDC175	0	1
ITGAE	3	0
PDK1	1	0
SUN2	2	3
PDK2	2	0
LNPEP	0	1
ALPI	0	3
ZNF292	9	2
SEC61A1	3	1
SEC61A2	0	1
ALPL	2	0
PTGS2	1	0
PECR	0	1
TM2D3	3	1
GOLGA4	0	4
PUF60	2	0
ZFAND4	1	1
ZFAND3	2	0
ZFAND1	1	0
PLVAP	2	0
CEP128	1	1
SLC39A10	1	0
SLC39A11	1	2
SLC39A14	3	0
SCN2B	1	1
CEP120	4	1
MIR1-1HG	1	0
NTRK1	5	1
NTRK2	2	2
NTRK3	4	1
ARHGAP23	3	0
ARHGAP22	1	0
ARHGAP21	3	1
ARHGAP20	2	0
ARHGAP27	0	1
ARHGAP26	1	0
ARHGAP25	4	1
ARHGAP24	1	1
NARFL	3	0
ARHGAP29	1	0
ARHGAP28	1	0
CHST12	4	2
HHAT	1	1
MICALCL	1	0
EPHB3	5	1
RXFP3	2	2
COL19A1	2	1
NKRF	1	1
PMF1-BGLAP	1	1
SMAD2	2	0
MYSM1	2	0
ATG2A	6	2
ATG2B	5	1
BMP7	1	1
BMP6	2	0
GPR1	0	1
BMP4	1	0
BMP3	1	0
BMP1	9	3
NDUFAF4	1	0
OR5R1	2	0
TERF2	1	0
RASSF9	1	0
RASSF8	1	0
RASSF1	1	0
PTOV1	3	1
RASSF3	1	1
RASSF2	0	1
RASSF4	1	0
RASSF7	0	2
RASSF6	2	0
NHP2	0	1
RSAD2	1	0
RSAD1	0	1
CHD1	4	0
CHD3	7	1
CHD2	1	2
CHD5	8	3
CHD4	5	3
CHD7	3	0
CHD6	5	1
CHD9	1	0
CHD8	4	1
CAP1	1	1
CAP2	1	1
NPC2	1	0
NPC1	2	0
SKIV2L	1	0
CSNK2A3	1	0
TTC4	1	0
TTC1	0	2
IL4R	2	2
BHLHA15	3	0
RAB3GAP1	1	0
PRKCE	1	0
TTC8	2	1
DYNC1LI1	0	1
CHDH	3	0
EFHC1	0	1
ETHE1	1	1
PRDM16	6	4
MPG	3	0
PLSCR4	1	1
PRDM15	4	1
PRDM12	1	0
ABCG5	1	1
PRDM10	5	4
PRDM11	1	0
ABCG8	3	1
MPO	3	2
MPL	0	1
HNF4A	3	0
MPI	1	0
PXDN	7	1
POLRMT	7	0
SGSM3	1	2
MPZ	1	0
HIST1H3G	1	0
MCPH1	3	0
KDM1A	1	0
GRPEL2	1	0
PUM1	3	2
HIST1H3D	2	0
OR1S1	1	0
GADL1	1	0
KRTAP5-10	1	0
KRTAP5-11	0	1
QRSL1	1	1
AKR1B10	1	0
FCER1A	1	0
BTG2	1	0
AKR1B15	1	0
SRD5A3	3	0
SRD5A1	1	1
ARMT1	2	1
HELLS	1	0
PDILT	2	1
SEC11C	0	1
ZFP36L2	2	1
GGA1	3	0
GGA3	3	0
GGA2	1	1
C10orf90	4	1
C15orf41	1	0
C15orf43	0	1
FHOD1	1	1
FHOD3	3	1
ADH7	0	1
ADH6	1	0
ADH5	1	0
PKD2	1	1
PKD1	24	11
GJC3	2	0
GJC1	0	1
SPRYD3	3	1
PRKACA	1	0
PSMB9	1	0
PRKACB	1	0
PSMB7	1	0
ZNF131	1	0
PSMB5	1	0
ZNF133	4	1
PSMB3	4	1
PSMB2	1	0
ZNF136	1	0
LMBR1L	3	0
TMA7	1	0
HDHD3	1	0
SPG7	3	1
PPARGC1B	4	4
RAPSN	1	1
LY75-CD302	3	3
CORO6	1	1
MBL2	1	0
CIART	1	0
TCEB3B	1	4
KCNK4	1	1
KCNK5	1	2
KCNK6	0	1
TRAT1	0	1
MLH3	2	0
KCNK1	1	0
MLH1	2	1
KCNK3	3	1
EPS15	1	1
TRIML2	1	0
C9orf142	1	0
TRIML1	0	1
NACC2	1	1
VPS13D	14	4
ACOT12	2	2
ACOT13	3	0
VPS13A	8	0
SH3KBP1	1	0
VPS13C	6	2
VPS13B	5	3
BEX2	1	0
KIAA0556	1	0
SCAF11	1	0
NUP160	1	2
TMEM165	0	1
FOXN4	0	2
TMEM168	1	0
EVI2B	3	0
FOXN1	1	1
FOXN2	1	0
FOXN3	3	0
XYLB	1	1
COL14A1	5	0
OR4X1	2	0
GRIN2B	8	0
GRIN2C	3	1
GNA14	0	1
GRIN2A	5	1
GNA12	1	0
KLHDC8B	1	1
KLHDC8A	0	1
GNA11	1	0
NOL8	1	2
IFFO1	2	2
TAP2	0	2
PRKAR1B	6	0
MFGE8	3	1
SH2B1	2	1
IL6ST	2	1
SNAP91	2	4
SBF2	5	0
DBN1	1	0
ADD2	6	1
OGDH	1	2
TGIF2-C20orf24	1	0
OLIG3	1	0
SEMG1	0	2
UPP1	1	1
SEMG2	1	1
WEE2	3	0
LMBRD1	1	1
DAZL	1	1
SRFBP1	2	0
BCAT2	2	0
BCAT1	1	0
LSM11	2	1
TMEM9B	1	0
AAED1	1	0
MACROD2	0	1
GBA2	2	1
AKAP6	4	3
AKAP7	0	1
DBNL	3	0
AKAP1	2	3
CAGE1	2	2
EIF2D	1	0
AKAP8	2	1
AKAP9	10	1
EIF2A	0	1
PPIP5K1	0	1
CYP26A1	0	1
PSTK	1	0
TUBE1	1	0
KLHL36	4	1
TMEM170B	1	0
RRP1B	4	0
NOVA2	1	2
NOVA1	1	0
DNAH11	11	2
RAB7A	0	1
CCDC113	2	0
SMC1B	4	0
KRR1	2	0
TMEM132E	5	1
FAM64A	2	0
TMEM132A	2	2
PEG10	2	0
TMEM132B	5	1
OVGP1	1	1
STRN	1	0
NAIF1	1	0
CCL28	1	0
PCLO	10	3
DIO2	1	0
VSX2	1	1
CCL20	1	0
CCL23	0	1
CCL22	1	0
CCL24	0	1
ALPK1	2	0
ALPK3	7	0
AGAP11	1	1
TRIOBP	8	2
C8orf48	2	0
UCK1	0	1
C8orf46	1	0
MGLL	1	0
UCK2	0	1
PHRF1	8	2
TP53I3	1	0
CUX1	9	2
CUX2	3	2
TMEM94	5	1
BRF2	1	1
BRF1	1	2
DNAJC8	1	0
CSNK1A1	2	0
MB	1	0
CAMSAP2	7	0
CAMSAP3	3	0
DNAJC6	1	1
CAMSAP1	4	3
DNAJC1	1	0
DNAJC3	0	1
CCDC94	2	0
RRP12	1	1
SLC18A2	2	0
SLC18A1	1	0
RRP15	1	0
OR10J1	0	1
CCDC97	1	0
RALBP1	1	2
MAP3K6	5	0
PPP1R8	4	0
ZNF831	4	4
MTNR1B	1	0
ZNF835	3	0
ZNF837	1	3
ZNF836	2	0
INTS5	4	1
MAP3K5	2	1
IPO11	0	1
LRIF1	0	1
MTNR1A	1	0
PHAX	1	0
TPSG1	3	0
OR51V1	1	0
ATOH1	2	1
RNF152	2	0
CD200R1	0	1
LIMD1	3	0
NUGGC	5	0
ATOH8	3	1
IVD	1	0
FMOD	1	0
MECP2	0	2
ZNF578	1	1
LDLR	2	3
ZPBP	1	0
OR8S1	0	1
RBMXL1	0	2
ZFYVE21	1	0
SLC17A8	2	1
TPCN1	5	1
TPCN2	1	0
RAB33B	1	0
SLC17A4	4	1
SLC17A5	0	1
TAS2R4	0	1
ZFYVE28	3	1
TAS2R3	1	0
SPAG16	3	1
SPAG17	4	1
MDH1B	1	2
C16orf58	2	0
RBMXL2	1	0
TRPV3	3	4
MRAP2	1	0
CDK5RAP2	2	1
CMTR2	1	1
CMTR1	3	0
CDK5RAP1	0	1
PDDC1	1	0
KIAA0319L	4	0
MYF5	0	1
AP5B1	4	3
GNB1	4	0
ERC1	1	1
ERC2	3	3
CCDC144A	1	0
CTSK	0	1
BHMT2	2	0
COBLL1	2	1
SLC37A3	0	1
CDK18	1	1
CDK19	1	0
GFI1B	1	0
FMO4	1	0
PMPCA	2	1
TOB2	2	0
CDK12	1	1
CDK13	3	0
CDK10	2	0
CDK16	1	1
CDK17	1	1
CDK14	1	0
ST5	4	1
ST7	1	0
GZF1	3	0
ATP6V1B1	2	2
ATP6V1B2	2	0
NOS1AP	2	0
PIP5KL1	2	1
CTSD	5	1
ZNF304	1	0
FBXO16	1	0
ZNF300	2	0
FAM216A	1	0
CTSF	2	0
STS	1	0
MMP25	3	0
MMP24	4	0
MMP27	0	1
KCNAB2	2	0
MMP21	1	0
MMP20	0	1
P2RY4	0	1
HOXB13	1	0
MAP4K4	2	0
RPL15	1	0
TFG	0	1
HVCN1	2	0
RND1	0	2
NCL	1	1
CTNNBIP1	1	0
PPP3CA	3	0
SESTD1	1	3
KIAA1549	13	2
LRRC41	1	0
LRRC40	2	0
LRRC43	3	2
LRRC42	1	0
LRRC45	1	2
LRRC47	2	1
LRRC46	0	1
LRRC49	0	1
B3GNT4	0	1
B3GNT5	0	1
B3GNT7	3	1
FNDC8	2	1
B3GNT2	0	1
B3GNT3	1	0
FNDC4	1	0
FNDC5	0	1
FNDC7	2	2
B3GNT8	0	1
FNDC1	6	2
ADRA2B	0	1
FGFR3	4	4
PWWP2B	5	0
SEPT11	0	1
FGFR1	4	3
GINM1	0	1
PLXNA2	4	0
TBCCD1	1	1
DAAM1	4	0
DAAM2	6	1
MAGEA8	1	0
PSRC1	1	0
CCDC152	0	1
CCDC153	1	0
CCDC150	1	1
CCDC151	1	0
GUK1	2	0
CCDC157	3	1
SGK494	1	0
YIF1A	4	0
CCDC158	2	0
WRAP73	1	0
H1FNT	2	0
DZIP3	2	2
SYT8	3	1
TLR10	1	0
LRRC4C	0	1
LRRC4B	0	1
FN1	5	5
H1FX	2	1
SYT2	2	0
SYT3	1	1
SYT4	1	1
SYT5	0	1
SYT6	1	0
SYT7	1	0
RHO	2	0
MEP1A	1	0
MEP1B	1	4
TASP1	3	0
PCED1A	1	0
OR51E1	0	1
PCED1B	2	0
FUBP3	2	0
FUBP1	2	2
NCSTN	1	0
SCHIP1	2	1
SPZ1	1	0
CEP104	3	2
FAM189A2	1	0
FAM189A1	2	0
MARCO	2	2
TCP11L1	0	2
TCP11L2	2	0
NES	2	1
CCZ1B	1	0
PALMD	1	0
ANGPT2	2	0
ANGPT1	0	1
DRC3	2	1
DRC1	1	0
PALM3	2	0
DUPD1	1	0
SEPT10	1	2
OR5T1	1	0
OR5T3	1	0
C1orf50	0	1
C1orf56	0	1
C1orf54	2	0
MARC1	2	0
MARC2	1	1
ICMT	1	0
GPR142	3	1
RGP1	0	1
FCF1	1	0
ATP6V0A4	5	1
ATP6V0A2	4	0
GUCA1A	0	1
GUCA1C	2	0
GUCA1B	1	0
KRT75	3	0
KRT74	1	1
KRT77	1	0
KRT76	3	0
KRT71	4	1
KRT73	2	1
KRT72	4	2
ATM	5	2
KRT79	3	0
KRT78	1	0
C17orf100	2	0
SMPD4	6	2
ATR	7	2
ADAM33	4	1
ACOXL	2	2
SMPD2	1	0
BRIP1	2	1
PDE11A	2	2
RPL36A-HNRNPH2	1	0
DNAJC5B	3	0
ITGBL1	2	0
ZNF571	2	0
ATP5A1	2	1
HFE2	2	0
TTC28	10	1
TTC29	3	1
HYPK	2	0
TTC24	2	1
TTC27	3	0
PATL2	1	1
TTC22	1	0
PATL1	3	1
CARS	5	0
PODXL2	2	0
U2SURP	1	0
IL6R	1	0
ENO1	2	0
ENO3	2	0
CARF	1	0
TAOK1	0	1
TAOK2	2	0
SYCP1	1	1
CNOT6L	3	0
FAXC	0	1
SLC22A18	4	1
LLGL1	9	4
ACOX2	2	2
ACOX3	1	2
SLC22A14	2	0
CFI	1	1
SLC22A12	5	3
SLC22A13	1	0
SLC22A10	1	0
SLC22A11	0	1
NSMCE2	1	0
NSMCE3	1	1
ANKFY1	5	3
OBSCN	29	15
DAGLA	4	1
PTK2	2	6
PTK7	1	1
PTK6	4	1
RABGAP1	1	1
PRKAA2	2	1
SERGEF	1	0
GLYR1	0	1
ITGB3BP	1	0
RCSD1	3	0
MCL1	1	0
SORBS1	1	0
SORBS3	3	1
SORBS2	3	2
GAL3ST4	3	1
SCARA3	2	0
IL17RD	1	3
ATG16L1	1	1
ATG16L2	1	1
NIPAL3	1	1
C3orf33	0	1
C4orf51	1	0
C3orf30	1	0
C3orf36	1	0
ARHGDIA	2	0
USH1C	3	2
NANS	1	0
USH1G	1	1
IL17REL	2	0
MATN1	1	0
MATN3	1	0
MATN2	4	0
MATN4	2	0
TANC1	3	2
TANC2	3	0
CES1	1	1
CES3	4	0
EBF4	1	1
KBTBD13	1	0
KBTBD12	1	1
EBF1	0	1
SCG5	1	0
UCP1	1	1
LMNA	2	2
UCP3	1	0
BDH2	1	0
ENDOU	2	0
DDX23	1	0
DDX21	2	0
DDX20	2	0
DDX27	1	1
ZNF157	1	0
ZNF154	1	0
DDX24	2	0
DDX28	0	1
ZNF90	1	2
ZNF91	2	1
KRTAP4-3	1	0
SAC3D1	0	1
FBXO18	2	3
FKBP15	1	0
UBE2J1	0	1
FKBP10	4	0
TBX21	2	2
TBX20	1	0
FBXO10	1	1
FBXO11	4	0
FAM3D	0	1
RAET1L	0	1
FBXO15	1	0
PDPN	2	4
GGPS1	2	0
SFTA3	1	0
PRB3	1	0
PROX1	0	1
CNGB1	5	1
C9orf163	1	0
FAM153B	1	0
BCLAF1	1	1
PLA2G6	3	0
PLA2G7	1	1
PLA2G3	2	0
GDPGP1	2	0
SHC4	1	0
CCDC77	0	1
ATPAF1	1	1
SHC1	0	1
ERBB4	2	1
SHC3	2	1
OR2G2	1	0
FPR2	1	2
OR2G6	0	1
CCDC78	2	1
CGRRF1	1	0
TMEM109	1	1
TMEM108	2	2
NACAD	2	0
NENF	0	1
TMEM102	1	0
TMEM101	2	0
FOXH1	1	0
TMEM104	2	0
SMPDL3B	2	0
GHITM	1	0
SMPDL3A	1	0
TRANK1	6	6
FAM90A1	0	1
CSHL1	3	0
SPEN	8	0
ZCWPW2	0	1
FKBP1B	1	0
SPEG	7	2
MANEAL	1	0
SSC4D	2	0
FBLIM1	1	2
DAXX	1	0
CDC16	1	0
MET	3	0
AHNAK	10	2
TBATA	2	0
NT5E	1	0
MAP10	5	2
UNC50	1	0
NKAIN4	1	0
NKAIN2	1	0
NKAIN1	0	1
MAP1A	4	5
MAP1B	3	3
PDCL2	2	0
UNC5B	0	3
UNC5C	5	1
VGF	1	0
UNC5A	3	3
UNC5D	3	0
CCM2	2	1
MAP1S	6	3
FRMD8	2	0
CCP110	2	0
SPICE1	3	0
FRMD6	5	0
FRMD7	1	0
FRMD1	4	0
PKNOX2	3	0
GNAQ	1	0
UBA7	3	2
MED13L	6	2
PTCD3	2	0
DSCR3	1	0
PTCD1	2	1
CSPG4	6	5
GNAL	1	0
HLTF	0	1
AGFG2	0	1
AGFG1	3	0
DPF2	1	1
DPF3	2	1
DPF1	2	1
ASNA1	1	0
PSPH	1	0
SIX1	1	0
KRT3	3	5
KRT2	1	2
KRT1	1	0
FST	0	1
CRYGN	0	1
KRT4	1	1
CRYGA	2	0
CEND1	1	0
CRYGC	2	0
DACT1	3	1
DACT2	1	0
VPS45	2	0
BORCS5	1	0
VPS41	2	0
PFKFB4	0	1
TMCC1	2	0
TMCC2	1	0
ECT2L	3	2
SDR42E1	1	1
TAS2R30	0	1
TAS2R31	1	0
NMNAT3	3	0
ALOX12B	2	1
RPS19	0	2
TAS2R39	1	1
RPL36A	1	0
PPCDC	0	1
EPB41L3	2	0
EPB41L2	1	1
EPB41L5	1	2
ACSS3	0	2
ACSS1	5	0
KIDINS220	3	1
PLEKHM1	6	1
PLEKHM2	7	0
ABCA13	11	7
VPS4A	1	0
GMEB2	1	0
PCOLCE2	1	0
SLC43A3	2	1
SLC43A2	3	0
SLC43A1	2	0
OR5C1	1	1
DCAF13	1	1
DFNA5	4	0
TAGAP	0	1
VHL	1	0
WNT3	2	0
WNT2	2	0
WNT1	0	1
SZRD1	1	0
AGXT	2	2
LRRN2	1	0
LRRN1	1	0
WNT4	1	1
TREML2	3	1
TREML1	1	0
GPAA1	2	1
TREML4	1	0
ST8SIA6	2	0
DCAF17	2	0
CDHR2	8	2
RIPK4	1	2
RECK	2	2
INSC	2	0
MRPL37	1	0
CH17-360D5.1	3	0
GPRIN1	1	2
SPDYE1	1	0
CDHR5	1	0
INSR	6	1
MRPL35	0	1
RUNX1T1	2	0
HIST2H2BE	2	0
ZNF813	0	1
SPTBN5	17	6
SPTBN4	8	4
SPTBN2	10	5
SPTBN1	6	5
ZNF814	1	1
VEPH1	1	0
KLF10	0	1
KLF17	1	1
KLF16	1	0
KLF15	2	1
KLF14	2	0
SLC9B1	1	0
TFAP2C	1	1
TFAP2B	0	1
TFAP2E	3	1
STAT4	1	2
GBE1	4	2
FGGY	3	0
SLC44A1	1	0
SLC44A2	1	0
SLC44A3	1	0
SLC44A4	2	1
SLC44A5	2	0
ZBTB7B	4	1
PCNT	9	5
PCNX	3	2
MRPL39	1	1
ENGASE	3	3
PACRG	1	1
KLK1	1	0
TOP3A	1	1
DNPH1	1	1
RPA1	1	0
RPA2	0	1
NDUFS1	1	0
REC8	0	2
MRO	2	0
COQ9	1	0
NDUFS5	1	0
NDUFS6	2	0
SLC9A3R2	2	1
NDUFS8	0	1
COQ4	2	0
COQ7	2	0
COQ6	1	0
COQ3	0	1
COQ2	2	0
FAM198A	0	1
SLC9B2	2	0
ZRANB1	2	0
ZRANB3	1	0
WARS2	1	0
PCDHGB3	2	0
PCDHGB2	4	2
PCDHGB1	3	0
PCDHGB7	2	2
PCDHGB6	2	0
PCDHGB5	1	0
PCDHGB4	1	0
BOC	2	0
RREB1	12	0
TPX2	1	1
DENND2A	4	1
DENND2D	1	1
WWC2	2	0
RABAC1	2	2
INPP4B	1	0
INPP4A	2	0
MICAL1	2	0
MICAL2	5	0
TP53AIP1	1	0
PHC1	1	1
PHC3	1	1
PHC2	3	1
GPR108	1	1
MFAP3L	0	1
BRICD5	0	1
PIANP	0	1
ZNF362	1	1
ZNF365	1	3
GRXCR2	0	1
ZNF366	5	1
PRF1	1	1
MGMT	1	0
ABCA9	5	2
ZNF415	1	0
KCTD21	1	0
AP1G2	0	1
H2AFX	1	0
H2AFY	1	1
RNF8	1	0
RNF6	1	3
ZNF410	1	0
RNF2	3	0
AVPR2	1	1
H2AFJ	1	0
NCAPG2	2	1
RFX1	6	4
LRRC69	1	1
CLTA	2	0
PPP1R21	2	0
CLTC	4	2
CLTB	1	0
TMEM59L	1	0
GLIPR2	1	0
LRRC61	0	1
NGLY1	1	0
LRRC66	4	1
FLG	18	8
DPEP3	2	2
IPMK	2	0
NMD3	0	1
C7orf31	0	1
NLRX1	4	0
SPATA31C2	2	2
TEX43	0	1
TEX40	1	0
MSANTD3-TMEFF1	1	1
PCOLCE	1	0
MRGPRE	4	1
EPM2A	1	0
ISCA2	0	1
FAM118A	5	2
FAM118B	2	0
LMX1A	0	2
ZCCHC24	0	1
LMX1B	2	0
RECQL	1	0
MISP	6	0
ETV3L	1	0
POU4F1	1	2
GGT1	3	0
PRKRIR	1	0
ACTR8	2	1
BAIAP3	3	2
ACTR6	2	1
ACTR5	2	1
MALSU1	1	0
FOXP2	1	0
WBSCR27	3	0
VAX2	2	0
VAX1	3	0
MTG2	2	1
FBF1	3	2
WBSCR28	1	1
FOXP1	0	1
GNRHR	1	0
PDE3B	1	1
ADNP	4	1
CNR1	3	0
GBX1	1	0
FOXP4	4	1
POLDIP3	1	0
C1GALT1C1L	0	1
GP1BA	3	0
HM13	0	1
RAPGEFL1	1	0
ALDH18A1	2	0
PXK	1	2
ICOS	1	0
CCDC144NL	2	2
ACTN1	3	1
TBR1	2	0
TGS1	1	0
ANKS1B	2	3
ABI3BP	2	1
ANKS1A	1	2
IDUA	1	0
PPOX	3	0
GLB1	3	0
PITPNM1	3	0
MORF4L1	1	0
PITPNM3	8	0
PITPNM2	6	2
GLYATL2	0	2
CPED1	2	1
MDGA1	5	1
MDGA2	0	1
ADAM10	1	0
ADAM11	2	0
ADAM12	5	2
ADAM17	1	0
ADAM18	0	1
ADAM19	2	1
MEPE	1	0
CPNE3	2	0
CPNE1	1	0
CPNE7	2	4
CPNE6	2	2
CPNE5	3	1
WNT8B	1	0
G3BP1	1	0
DNMT3B	2	1
DNMT3A	2	1
DNMT3L	3	1
AAK1	2	0
GDE1	0	1
SNRPB	2	0
SHANK3	7	2
SHANK2	7	1
SHANK1	11	2
OR52M1	0	1
ZNF556	1	1
SALL4	3	3
TECR	1	1
PLAC8L1	1	2
PTPRJ	3	2
UCP2	1	1
FLT3LG	0	1
ZDHHC17	1	1
PCSK9	3	2
ZDHHC11	3	0
ZDHHC13	1	1
ZDHHC12	1	1
PCSK2	1	0
PRKAG3	2	1
PCSK1	2	1
ZDHHC18	2	0
PCSK4	3	4
PCSK5	4	2
HIPK3	3	0
HIPK2	6	1
HIPK1	2	1
PHYHIPL	1	0
HIPK4	3	2
DUSP22	1	0
DUSP23	2	1
LEMD3	1	0
LEMD2	3	0
DUSP27	3	1
QARS	4	0
NCAN	1	2
NAPG	1	0
ESPL1	4	0
C3orf18	2	0
NAPA	1	0
C3orf17	1	0
YAF2	1	0
LARP1	1	1
LARP4	2	1
LARP6	1	0
LARP7	1	0
ISM1	1	0
DDX49	0	1
COL15A1	3	2
ODAM	2	1
DDX41	1	1
TMEM45A	1	1
EDIL3	1	0
ZNF177	1	0
PTER	0	1
DDX47	1	0
DDX46	2	1
PTEN	1	0
PLTP	1	3
ATMIN	1	0
EIF5A2	0	1
ELAVL4	3	0
LGR4	3	0
LGR6	4	2
ELAVL2	2	1
ELAVL3	2	0
IFT52	0	1
LSM14B	1	1
GPATCH1	1	0
DPYSL5	1	0
SETBP1	3	3
SAMSN1	1	1
FERD3L	0	1
SAP130	5	1
DNAI1	2	0
DNAI2	0	2
APOB	9	5
APOM	2	1
APOH	1	1
FAM151B	0	1
FAM104A	1	0
IL2	1	1
TMEM125	0	1
FOXJ1	1	1
FOXJ2	0	1
FOXJ3	1	0
FRAS1	8	10
CCDC57	1	1
C9orf72	0	1
TMEM129	1	0
TMEM128	1	0
PAXIP1	2	2
NUFIP2	2	0
VPRBP	3	0
PREPL	0	3
CABP7	2	0
CABP5	1	0
CABP4	2	0
CABP1	1	0
FBXO34	2	0
SLC35B3	1	2
SLC35B2	3	0
FBXO30	0	3
FBXO32	1	1
FBXO33	1	0
FBXO38	1	0
DNAJB11	1	0
PELP1	4	0
MBOAT2	1	1
MBOAT1	3	1
PHF21A	1	0
MBOAT4	2	1
SPSB3	2	1
SPSB2	1	0
SPSB1	1	1
APBB3	1	1
COL16A1	9	2
ARMCX5-GPRASP2	1	0
HINT3	1	0
SLC25A53	1	0
SDPR	0	1
UNC79	4	2
CDC34	1	0
CDC37	2	3
ALAS1	1	2
OR2A2	1	1
OR2A5	1	0
FICD	3	1
FLNC	5	5
S100A4	1	0
OR2T34	1	1
BRWD1	6	4
S100A1	1	0
OR2T33	0	1
S100A2	1	0
LONRF2	3	0
LONRF1	3	2
TCFL5	1	0
BIRC3	0	1
AIP	1	0
CDCA7L	1	1
MOSPD3	0	1
APBA1	0	1
APBA3	2	2
APBA2	3	1
DENND6B	1	1
EFHB	1	0
COL10A1	1	1
WDR7	5	0
MORC1	3	0
MORC4	1	0
PTPRZ1	0	1
RB1CC1	3	1
CCNA2	1	0
WDR1	4	1
CCNA1	1	0
DYNC1I1	1	0
ATP13A3	3	0
DYNC1I2	1	0
ATP13A5	7	1
ATP13A4	3	0
TAS2R50	1	0
RAI1	2	2
RAI2	1	0
COL28A1	2	0
LRRIQ1	3	0
GRID2IP	4	1
PRKRA	0	1
LRRIQ4	1	1
C1orf112	2	0
C1orf111	1	2
C1orf116	3	0
C1orf115	1	0
MEF2D	0	1
LGALS3BP	4	1
TTBK2	4	2
TTBK1	1	2
E2F7	1	0
E2F5	1	0
E2F3	1	1
E2F2	0	1
E2F1	0	2
ZNFX1	5	2
C6orf89	3	0
MAGEF1	3	0
ACBD3	1	0
ACBD7	1	0
PPP1R13B	3	3
MON2	1	1
PPP1R13L	1	2
EEF2	6	2
ZDBF2	1	3
BRI3BP	1	0
TUSC1	1	0
TUSC3	1	0
RLBP1	1	1
PCDHGA10	2	1
EPHX2	2	0
HYLS1	1	1
IZUMO1	1	1
EPHX3	1	0
IZUMO4	2	0
FAM234B	4	1
PYCR2	0	3
PYCR1	2	0
FAM234A	2	1
OR5H15	2	0
OR5H14	2	2
WNT10A	2	1
WNT10B	1	0
URB2	5	2
URB1	5	3
IL36G	1	0
IFITM3	2	0
IFITM2	2	0
LIPC	3	1
LIPE	2	0
IFITM5	2	1
LIPF	1	0
LIPI	1	0
TMC8	1	1
LIPK	2	0
LIPJ	1	0
LIPM	1	1
DFFA	1	0
DFFB	1	0
LIPN	1	0
SEC24D	3	1
REV3L	8	2
SEC24A	3	0
SEC24C	3	1
SEC24B	2	1
RNF19B	1	1
RNF19A	1	1
HOGA1	0	1
IL2RG	2	0
CSMD3	13	3
DPP4	3	0
MRPL43	2	0
IPP	1	1
MRPL40	1	0
MRPL47	1	1
MRPL46	3	0
HGFAC	5	4
MRPL44	2	0
TRIP6	2	1
TM4SF19	0	1
MRPL49	2	2
PI15	1	0
CCND3	1	0
SAMD12	1	0
ZNF699	1	3
POM121C	2	0
RILP	1	2
ZNF691	1	0
ZNF692	1	0
ZNF695	1	0
ZNF697	1	1
FHAD1	2	2
HDC	2	0
OR52H1	1	0
LAMB1	4	2
LAMB3	9	2
LAMB2	6	3
CYSLTR2	1	1
LAMB4	3	2
ATP7B	5	1
MPHOSPH9	3	0
MPHOSPH8	1	0
NEK4	2	0
RUVBL1	1	0
NEK3	1	0
NEK1	2	3
U2AF2	2	2
NEK8	1	1
NEK9	1	0
GPR162	3	0
GPR160	1	1
GPR161	3	2
G0S2	0	1
ZZZ3	0	1
COQ10B	1	0
ASTN2	0	1
ASTN1	1	1
SHD	2	0
CCDC7	0	1
SHF	2	0
SHH	0	1
CCDC8	1	0
CCDC9	1	0
DYNC2H1	10	0
MGA	4	1
MTHFD2	0	1
MTHFD1	2	1
TBP	1	0
MGP	1	0
NSD1	2	1
NUDCD3	1	1
ADSS	1	0
STBD1	2	0
OR1D2	1	1
GMNN	1	0
ADSL	1	1
WDHD1	3	1
LUM	0	1
GAS2L1	2	4
SLX4	7	2
GAS2L3	3	0
GAS2L2	4	2
TGM7	2	1
HPGDS	1	0
ZNF343	1	0
ZNF341	3	0
ZNF436	1	0
ZNF431	2	0
ZNF346	1	0
ZNF433	2	3
ZNF432	0	1
RPS27A	1	0
RALGDS	6	2
CCDC190	0	1
KRTAP26-1	1	0
EPYC	2	0
NUDT12	2	0
DLL1	5	3
DLL3	2	0
NUDT16	0	1
NUDT17	2	1
NUTM1	1	0
HOTS	1	0
ZW10	1	1
NUDT19	0	3
OR6X1	3	0
STX8	2	0
TM6SF2	1	1
KEL	2	1
IFI6	1	0
RTCB	1	2
STX3	1	0
ACTL9	1	0
ACTL8	1	1
CPN2	4	1
CPN1	2	0
GSR	2	0
SLC4A10	3	1
STAB1	7	7
STAB2	4	1
KIAA0232	5	0
RNFT2	3	0
LGI4	0	1
CFHR1	0	1
CDADC1	0	1
ECE2	0	1
ECE1	3	0
LGI3	1	1
NLGN2	3	0
HBP1	2	0
CLIC3	2	0
ARHGAP44	4	2
DRG1	1	0
CASQ1	2	2
PHACTR3	3	1
CASQ2	1	0
PHACTR2	1	0
OC90	1	0
EVC2	7	4
AURKA	0	1
AURKB	1	0
AP1B1	4	1
PHYKPL	3	0
OR5H6	1	2
OR5H1	2	0
RNF123	5	0
OR5H2	2	0
RABL2A	1	0
CDC42EP1	3	0
DRGX	3	1
TXLNB	2	2
TXLNA	0	1
CDC42EP4	1	0
FAM92B	1	0
TCP11	1	0
GPRC6A	2	1
TBKBP1	2	0
AHCY	1	0
FAM170B	1	2
WFIKKN1	5	0
ABI2	0	1
ABI3	2	0
FEZ2	3	0
TESC	1	1
[truncated: 11,149 more rows]
